# Supplementary material
Source: PubMed Central journal article supplement (PMC8866197)

## Syntax and output for Recodes, Correlations, and Regressions

\*SELECTING ONLY 18-49 year olds

USE ALL.

COMPUTE filter\_\$( (OVER50 = 0) AND (xconfirm = 1) ).

VARIABLE LABELS filter\_\$( (OVER50 = 0) AND (xconfirm = 1) (FILTER) ).

VALUE LABELS filter\_\$( 0 'Not Selected' 1 'Selected' ).

FORMATS filter\_\$( f1.0 ).

FILTER BY filter\_\$( ).

EXECUTE.

\*Assigning weights to under 50 age group

DATASET ACTIVATE DataSet1.

WEIGHT BY xadj\_under50\_weight.

\*SELECTING ONLY over 50

USE ALL.

COMPUTE filter\_\$( (OVER50 = 1) AND (xconfirm = 1) ).

VARIABLE LABELS filter\_\$( (OVER50 = 1) AND (xconfirm = 1) (FILTER) ).

VALUE LABELS filter\_\$( 0 'Not Selected' 1 'Selected' ).

FORMATS filter\_\$( f1.0 ).

FILTER BY filter\_\$( ).

EXECUTE.

\*Weights for over 50 age group

DATASET ACTIVATE DataSet1.

WEIGHT BY xadj\_over50\_weight.

**\*\*\* Creating Conflict aversion scale\*\*\***

RECODE X67NEW\_b X67NEW\_c (1=1) (2=2) (3=3) (4=4) (5=5) (ELSE=SYSMIS) INTO CA2 CA3.

EXECUTE.

\*Reverse code CA items 1 and 4

RECODE X67NEW\_a X67NEW\_d (1=5) (2=4) (3=3) (4=2) (5=1) (ELSE=SYSMIS) INTO CA1 CA4.

EXECUTE.

RELIABILITY

/VARIABLES=CA1 CA2 CA3 CA4

/SCALE('ALL VARIABLES') ALL

/MODEL=ALPHA

/SUMMARY=TOTAL.

### 18 – 49 Case Processing Summary

|       |                       | N      | %     |
|-------|-----------------------|--------|-------|
| Cases | Valid                 | 464.80 | 97.9  |
|       | Excluded <sup>a</sup> | 10.20  | 2.1   |
|       | Total                 | 475.00 | 100.0 |

Weighted by the variable Adjusted Under 50 weight

a. Listwise deletion based on all variables in the procedure.

### Reliability Statistics

| Cronbach's<br>Alpha | N of Items |
|---------------------|------------|
| .623                | 4          |

#### Item-Total Statistics

|     | Scale Mean if<br>Item Deleted | Scale Variance<br>if Item Deleted | Corrected Item-<br>Total<br>Correlation | Cronbach's<br>Alpha if Item<br>Deleted |
|-----|-------------------------------|-----------------------------------|-----------------------------------------|----------------------------------------|
| CA1 | 9.7564                        | 6.464                             | .456                                    | .511                                   |
| CA2 | 10.0717                       | 6.575                             | .430                                    | .532                                   |
| CA3 | 10.2894                       | 7.560                             | .318                                    | .610                                   |
| CA4 | 9.9579                        | 7.176                             | .408                                    | .549                                   |

#### 50+ Case Processing Summary

|       |                       | N       | %     |
|-------|-----------------------|---------|-------|
| Cases | Valid                 | 1274.51 | 97.8  |
|       | Excluded <sup>a</sup> | 28.50   | 2.2   |
|       | Total                 | 1303.00 | 100.0 |

Weighted by the variable Adjusted Over 50  
weight

a. Listwise deletion based on all variables in the  
procedure.

#### Reliability Statistics

| Cronbach's<br>Alpha | N of Items |
|---------------------|------------|
| .779                | 4          |

#### Item-Total Statistics

|     | Scale Mean if<br>Item Deleted | Scale Variance<br>if Item Deleted | Corrected Item-<br>Total<br>Correlation | Cronbach's<br>Alpha if Item<br>Deleted |
|-----|-------------------------------|-----------------------------------|-----------------------------------------|----------------------------------------|
| CA1 | 10.9084                       | 6.046                             | .593                                    | .721                                   |

|     |         |       |      |      |
|-----|---------|-------|------|------|
| CA2 | 11.2192 | 5.224 | .688 | .667 |
| CA3 | 11.4575 | 6.323 | .481 | .777 |
| CA4 | 11.1870 | 6.111 | .581 | .727 |

COMPUTE CAR=MEAN.2 (CA1, CA2, CA3, CA4).

VARIABLE LABELS CAR 'Conflict orientation scale recoded'.

EXECUTE.

**\*\*\* Creating Reactance scale\*\*\***

DATASET ACTIVATE DataSet1.

RELIABILITY

/VARIABLES=React1 React2 React3 React4

/SCALE('ALL VARIABLES') ALL

/MODEL=ALPHA

/SUMMARY=TOTAL.

RECODE Q61\_a Q61\_b Q61\_c Q61\_d (1=1) (2=2) (3=3) (4=4) (5=5) (ELSE=SYSMIS) INTO React1 React2  
React3 React4.

EXECUTE.

COMPUTE Reactr=MEAN.2 (React1, React2, React3, React4).

VARIABLE LABELS Reactr 'Reactance scale recoded'.

EXECUTE.

**18- 49 Case Processing Summary**

|       |                       | N      | %     |
|-------|-----------------------|--------|-------|
| Cases | Valid                 | 450.66 | 94.9  |
|       | Excluded <sup>a</sup> | 24.34  | 5.1   |
|       | Total                 | 475.00 | 100.0 |

Weighted by the variable Adjusted Under 50  
weight

a. Listwise deletion based on all variables in the  
procedure.

**Reliability Statistics**

| Cronbach's<br>Alpha | N of Items |
|---------------------|------------|
| .666                | 4          |

### Item-Total Statistics

|        | Scale Mean if<br>Item Deleted | Scale Variance<br>if Item Deleted | Corrected Item-<br>Total<br>Correlation | Cronbach's<br>Alpha if Item<br>Deleted |
|--------|-------------------------------|-----------------------------------|-----------------------------------------|----------------------------------------|
| React1 | 9.2726                        | 5.906                             | .540                                    | .532                                   |
| React2 | 9.1361                        | 7.329                             | .337                                    | .667                                   |
| React3 | 9.9216                        | 6.642                             | .459                                    | .592                                   |
| React4 | 9.3053                        | 6.308                             | .458                                    | .592                                   |

### 50+ Case Processing Summary

|       |                       | N       | %     |
|-------|-----------------------|---------|-------|
| Cases | Valid                 | 1276.38 | 98.0  |
|       | Excluded <sup>a</sup> | 26.62   | 2.0   |
|       | Total                 | 1303.00 | 100.0 |

Weighted by the variable Adjusted Over 50  
weight

a. Listwise deletion based on all variables in the  
procedure.

### Reliability Statistics

| Cronbach's<br>Alpha | N of Items |
|---------------------|------------|
| .597                | 4          |

### Item-Total Statistics

|  | Scale Mean if<br>Item Deleted | Scale Variance<br>if Item Deleted | Corrected Item-<br>Total<br>Correlation | Cronbach's<br>Alpha if Item<br>Deleted |
|--|-------------------------------|-----------------------------------|-----------------------------------------|----------------------------------------|
|--|-------------------------------|-----------------------------------|-----------------------------------------|----------------------------------------|

|        |         |       |      |      |
|--------|---------|-------|------|------|
| React1 | 8.8848  | 4.415 | .472 | .445 |
| React2 | 8.5405  | 5.479 | .304 | .580 |
| React3 | 10.0089 | 5.586 | .348 | .549 |
| React4 | 8.9783  | 4.994 | .392 | .515 |

**\*\*\*Computing masking behaviors\*\*\***

DATASET ACTIVATE DataSet1.

RECODE X7 (99=SYSMIS) (ELSE=Copy) INTO Mask1.

EXECUTE.

DATASET ACTIVATE DataSet1.

RECODE X8 (99=SYSMIS) (ELSE=Copy) INTO Mask2.

EXECUTE.

CORRELATIONS

/VARIABLES=Mask1 Mask2

/PRINT=TWOTAIL NOSIG

/STATISTICS DESCRIPTIVES

/MISSING=PAIRWISE.

**18-49 Correlations**

|       |                     | Mask1  | Mask2  |
|-------|---------------------|--------|--------|
| Mask1 | Pearson Correlation | 1      | .798** |
|       | Sig. (2-tailed)     |        | <.001  |
|       | N                   | 474    | 474    |
| Mask2 | Pearson Correlation | .798** | 1      |
|       | Sig. (2-tailed)     | <.001  |        |
|       | N                   | 474    | 475    |

\*\* . Correlation is significant at the 0.01 level (2-tailed).

### 50+ Correlations

|       |                     | Mask1  | Mask2  |
|-------|---------------------|--------|--------|
| Mask1 | Pearson Correlation | 1      | .694** |
|       | Sig. (2-tailed)     |        | <.001  |
|       | N                   | 1303   | 1303   |
| Mask2 | Pearson Correlation | .694** | 1      |
|       | Sig. (2-tailed)     | <.001  |        |
|       | N                   | 1303   | 1303   |

\*\* . Correlation is significant at the 0.01 level (2-tailed).

COMPUTE Mask\_T2=(Mask1 + Mask2)/2.

EXECUTE.

FREQUENCIES VARIABLES=Q67

/ORDER=ANALYSIS.

\*\*\*recoding other variables\*\*\*

RECODE Q67 (1=1) (2=2) (3=3) (4=4) (5=5) (6=6) (7=7) (8=4) (99=SYSMIS) INTO ideology.

VARIABLE LABELS ideology 'ideology q67 recoded'.

EXECUTE.

FREQUENCIES VARIABLES=ideology

/ORDER=ANALYSIS.

DESCRIPTIVES VARIABLES=ideology

/STATISTICS=MEAN STDDEV MIN MAX.

RECODE Q65 (1=1) (2=2) (3=3) (4=4) (5=5) (ELSE=SYSMIS) INTO Party\_3.

VARIABLE LABELS Party\_3 'Recoded Q65'.



EXECUTE.

\*\*\*strong dems

DO IF (Q65A = 1).

RECODE Party\_3 (1=1) INTO partycont.

END IF.

VARIABLE LABELS partycont 'Continuous party variable'.

EXECUTE.

\*\*\*Dems

DO IF (Q65A = 2).

RECODE Party\_3 (1=2) INTO partycont.

END IF.

VARIABLE LABELS partycont 'Continuous party variable'.

EXECUTE.

\*\*\*lean dem

DO IF (Q66A = 1).

RECODE Party\_3 (3=3) (4=3) (5=3) INTO partycont.

END IF.

VARIABLE LABELS partycont 'Continuous party variable'.

EXECUTE.

\*\*strong reps

DO IF (Q66 = 1).

```
RECODE Party_3 (2=7) INTO partycont.  
END IF.  
VARIABLE LABELS partycont 'Continuous party variable'.  
EXECUTE.
```

```
***republicans
```

```
DO IF (Q66 = 2).  
RECODE Party_3 (2=6) INTO partycont.  
END IF.  
VARIABLE LABELS partycont 'Continuous party variable'.  
EXECUTE.
```

```
****Lean Rep
```

```
DO IF (Q66a = 2).  
RECODE Party_3 (3=5) (4=5)(5=5) INTO partycont.  
END IF.  
VARIABLE LABELS partycont 'Continuous party variable'.  
EXECUTE.
```

```
***middle of the road folks
```

```
DO IF (Q66a = 3).  
RECODE Party_3 (3=4) INTO partycont.  
END IF.  
VARIABLE LABELS partycont 'Continuous party variable'.  
EXECUTE.
```

```
DO IF (Q66a = 4).  
RECODE Party_3 (3=4) INTO partycont.  
END IF.  
VARIABLE LABELS partycont 'Continuous party variable'.  
EXECUTE.
```

```
DO IF (Q66a = 3).  
RECODE Party_3 (4=4) INTO partycont.  
END IF.  
VARIABLE LABELS partycont 'Continuous party variable'.  
EXECUTE.
```

```
DO IF (Q66a = 4).  
RECODE Party_3 (4=4) INTO partycont.  
END IF.  
VARIABLE LABELS partycont 'Continuous party variable'.  
EXECUTE.
```

```
DO IF (Q66a = 3).  
RECODE Party_3 (5=4) INTO partycont.  
END IF.  
VARIABLE LABELS partycont 'Continuous party variable'.  
EXECUTE.
```

```
DO IF (Q66a = 4).  
RECODE Party_3 (5=4) INTO partycont.  
END IF.  
VARIABLE LABELS partycont 'Continuous party variable'.  
EXECUTE.
```

```
FREQUENCIES VARIABLES=partycont  
/ORDER=ANALYSIS.
```

\* Rename partycont to party

```
DATASET ACTIVATE DataSet1.  
RECODE partycont (ELSE=Copy) INTO party.  
EXECUTE.
```

**\*\*\* Trump and Biden Favorability**

```
RECODE X63_a (99=SYSMIS) (ELSE=Copy) INTO TrumpFavT2.  
EXECUTE.  
RECODE X63_b (99=SYSMIS) (ELSE=Copy) INTO BidenFavT2.  
EXECUTE.
```

```
DATASET ACTIVATE DataSet1.  
RECODE RACE_3 (ELSE=Copy) INTO black.  
EXECUTE.
```

\* Hispanic - hisp

```
RECODE Hispanic (99=SYSMIS) (1=1) (2=0) INTO Hispanic_r.  
VARIABLE LABELS Hispanic_r 'Hispanic_r'.  
EXECUTE.
```

\* Rename Hispanic\_r to hisp

```
DATASET ACTIVATE DataSet1.  
RECODE Hispanic_r (ELSE=Copy) INTO hisp.  
EXECUTE.
```

\* Male

```
RECODE Q81 (1=1) (ELSE=0) INTO male.  
VARIABLE LABELS male 'male'.  
EXECUTE.
```

\* Education - Educ

```
RECODE Q82 (1=10) (2=12) (3=14)(4=17)(99=SYSMIS) INTO education.  
VARIABLE LABELS education 'education in years'.  
EXECUTE.
```

\*\* Rename education to educ

```
DATASET ACTIVATE DataSet1.  
RECODE education (ELSE=Copy) INTO educ.  
EXECUTE.
```

\* Age

```
RECODE s1 (ELSE=COPY) INTO age.  
VARIABLE LABELS age 'age'.  
EXECUTE.
```

\* Income

```
RECODE Q83 (1=20) (2=25) (3=35)(4=45)(5=55)(6=65)(7=85)(8=125)(9=160)(99=SYSMIS) INTO income.
```

```
VARIABLE LABELS income 'income in thousands'.
```

```
EXECUTE.
```

```
FREQUENCIES VARIABLES=Q81 male Q82 education s1 age Q83 income Q84 Hispanic_r RACE_3
```

```
/ORDER=ANALYSIS.
```

**\*\*\*Bivariate Correlations**

CORRELATIONS

/VARIABLES= CAr Reactr ideology party BidenFavT2 TrumpFavT2 Mask\_T2

/PRINT=TWOTAIL NOSIG

/MISSING=PAIRWISE.

18 – 49 Correlations

|                      |                     | Conflict orientation | Reactance scale | ideology q67 recoded | party   | BidenFavT2 | TrumpFavT2 | Mask_T2 |
|----------------------|---------------------|----------------------|-----------------|----------------------|---------|------------|------------|---------|
| Conflict orientation | Pearson Correlation | 1                    | .086            | .057                 | -.067   | .048       | -.098*     | .244**  |
|                      | Sig. (2-tailed)     |                      | .065            | .217                 | .149    | .296       | .034       | <.001   |
|                      | N                   | 468                  | 466             | 468                  | 468     | 468        | 468        | 468     |
| Reactance scale      | Pearson Correlation | .086                 | 1               | .019                 | .045    | .117*      | .208**     | -.073   |
|                      | Sig. (2-tailed)     | .065                 |                 | .682                 | .332    | .011       | <.001      | .115    |
|                      | N                   | 466                  | 472             | 472                  | 471     | 471        | 470        | 471     |
| ideology q67 recoded | Pearson Correlation | .057                 | .019            | 1                    | .593**  | -.452**    | .366**     | .019    |
|                      | Sig. (2-tailed)     | .217                 | .682            |                      | <.001   | <.001      | <.001      | .679    |
|                      | N                   | 468                  | 472             | 475                  | 474     | 473        | 473        | 474     |
| party                | Pearson Correlation | -.067                | .045            | .593**               | 1       | -.443**    | .441**     | -.272** |
|                      | Sig. (2-tailed)     | .149                 | .332            | <.001                |         | <.001      | <.001      | <.001   |
|                      | N                   | 468                  | 471             | 474                  | 474     | 473        | 472        | 473     |
| BidenFavT2           | Pearson Correlation | .048                 | .117*           | -.452**              | -.443** | 1          | -.434**    | .224**  |
|                      | Sig. (2-tailed)     | .296                 | .011            | <.001                | <.001   |            | <.001      | <.001   |
|                      | N                   | 468                  | 471             | 473                  | 473     | 473        | 471        | 473     |
| TrumpFavT2           | Pearson Correlation | -.098*               | .208**          | .366**               | .441**  | -.434**    | 1          | -.129** |
|                      | Sig. (2-tailed)     | .034                 | <.001           | <.001                | <.001   | <.001      |            | .005    |
|                      | N                   | 468                  | 470             | 473                  | 472     | 471        | 473        | 472     |
| Mask_T2              | Pearson Correlation | .244**               | -.073           | .019                 | -.272** | .224**     | -.129**    | 1       |
|                      | Sig. (2-tailed)     | <.001                | .115            | .679                 | <.001   | <.001      | .005       |         |
|                      | N                   | 468                  | 471             | 474                  | 473     | 473        | 472        | 474     |

\*. Correlation is significant at the 0.05 level (2-tailed). \*\*. Correlation is significant at the 0.01 level (2-tailed).



50+ Correlations

|                         |                     | Conflict<br>orientati<br>on | Reactance | ideology q67<br>recoded | party   | BidenFavT2 | TrumpFavT2 | Mask_T2 |
|-------------------------|---------------------|-----------------------------|-----------|-------------------------|---------|------------|------------|---------|
| Conflict<br>orientation | Pearson Correlation | 1                           | .048      | -.001                   | -.049   | .068*      | -.052      | .071*   |
|                         | Sig. (2-tailed)     |                             | .083      | .979                    | .077    | .016       | .063       | .010    |
|                         | N                   | 1293                        | 1289      | 1289                    | 1291    | 1274       | 1283       | 1293    |
| Reactance               | Pearson Correlation | .048                        | 1         | .131**                  | .182**  | -.272**    | .256**     | -.084** |
|                         | Sig. (2-tailed)     | .083                        |           | <.001                   | <.001   | <.001      | <.001      | .002    |
|                         | N                   | 1289                        | 1299      | 1294                    | 1296    | 1278       | 1288       | 1299    |
| ideology q67<br>recoded | Pearson Correlation | -.001                       | .131**    | 1                       | .753**  | -.658**    | .624**     | -.152** |
|                         | Sig. (2-tailed)     | .979                        | <.001     |                         | <.001   | <.001      | <.001      | <.001   |
|                         | N                   | 1289                        | 1294      | 1298                    | 1297    | 1279       | 1288       | 1298    |
| party                   | Pearson Correlation | -.049                       | .182**    | .753**                  | 1       | -.783**    | .762**     | -.142** |
|                         | Sig. (2-tailed)     | .077                        | <.001     | <.001                   |         | <.001      | <.001      | <.001   |
|                         | N                   | 1291                        | 1296      | 1297                    | 1300    | 1281       | 1290       | 1300    |
| BidenFavT2              | Pearson Correlation | .068*                       | -.272**   | -.658**                 | -.783** | 1          | -.851**    | .272**  |
|                         | Sig. (2-tailed)     | .016                        | <.001     | <.001                   | <.001   |            | .000       | <.001   |
|                         | N                   | 1274                        | 1278      | 1279                    | 1281    | 1282       | 1273       | 1282    |
| TrumpFavT2              | Pearson Correlation | -.052                       | .256**    | .624**                  | .762**  | -.851**    | 1          | -.250** |
|                         | Sig. (2-tailed)     | .063                        | <.001     | <.001                   | <.001   | .000       |            | <.001   |
|                         | N                   | 1283                        | 1288      | 1288                    | 1290    | 1273       | 1292       | 1292    |
| Mask_T2                 | Pearson Correlation | .071*                       | -.084**   | -.152**                 | -.142** | .272**     | -.250**    | 1       |
|                         | Sig. (2-tailed)     | .010                        | .002      | <.001                   | <.001   | <.001      | <.001      |         |
|                         | N                   | 1293                        | 1299      | 1298                    | 1300    | 1282       | 1292       | 1303    |

\*. Correlation is significant at the 0.05 level (2-tailed). \*\*. Correlation is significant at the 0.01 level (2-tailed).

**\*\*\*Regressions predicting Masking (STATA)**

**. \*Predicting Masking**

**. \*Over 50**

```
. reg mask_t2 male education age income black hisp decmaskmandate car reactr ideology
trumpfavt2 [pweight=xadj_over50_weight] if over50==1, cluster(state)
(sum of wgt is 1,267.0597)
```

```
Linear regression                               Number of obs   =       1,237
                                                F(11, 43)      =         3.68
                                                Prob > F       =         0.0010
                                                R-squared     =         0.0880
                                                Root MSE     =         .71907
```

(Std. err. adjusted for 44 clusters in state)

| mask_t2        | Coefficient | Robust<br>std. err. | t     | P> t  | [95% conf. interval] |           |
|----------------|-------------|---------------------|-------|-------|----------------------|-----------|
| male           | -.1394521   | .0962472            | -1.45 | 0.155 | -.333553             | .0546488  |
| education      | .0267173    | .0179831            | 1.49  | 0.145 | -.0095489            | .0629836  |
| age            | .0090932    | .0053791            | 1.69  | 0.098 | -.0017548            | .0199412  |
| income         | .0006592    | .0007178            | 0.92  | 0.364 | -.0007884            | .0021068  |
| black          | -.0200506   | .0802882            | -0.25 | 0.804 | -.1819672            | .141866   |
| hisp           | .1102187    | .075491             | 1.46  | 0.152 | -.0420233            | .2624608  |
| decmaskmandate | -.023026    | .0713383            | -0.32 | 0.748 | -.1668934            | .1208415  |
| car            | .0503782    | .0555913            | 0.91  | 0.370 | -.0617322            | .1624887  |
| reactr         | -.0153337   | .0418716            | -0.37 | 0.716 | -.0997758            | .0691084  |
| ideology       | -.0003523   | .0230664            | -0.02 | 0.988 | -.0468701            | .0461655  |
| trumpfavt2     | -.044139    | .0125675            | -3.51 | 0.001 | -.0694839            | -.0187942 |
| _cons          | 3.754671    | .6819163            | 5.51  | 0.000 | 2.379455             | 5.129886  |

**. \*Predicting Masking**

**\*Under 50**

```
. reg mask_t2 male education age income black hisp decmaskmandate car reactr ideology
trumpfavt2 [pweight=xadj_under50_weight] if over50==0, cluster(state)
(sum of wgt is 462.7526)
```

```
Linear regression                               Number of obs   =         459
                                                F(11, 37)      =         2.98
                                                Prob > F       =         0.0063
                                                R-squared     =         0.0956
                                                Root MSE     =         .85374
```

(Std. err. adjusted for 38 clusters in state)

| mask_t2        | Coefficient | Robust<br>std. err. | t     | P> t  | [95% conf. interval] |           |
|----------------|-------------|---------------------|-------|-------|----------------------|-----------|
| male           | -.1477922   | .1667417            | -0.89 | 0.381 | -.4856429            | .1900585  |
| education      | .0163256    | .0297104            | 0.55  | 0.586 | -.0438733            | .0765246  |
| age            | .0098961    | .0072534            | 1.36  | 0.181 | -.0048007            | .024593   |
| income         | -.0000362   | .0020022            | -0.02 | 0.986 | -.004093             | .0040206  |
| black          | .0141767    | .1083102            | 0.13  | 0.897 | -.2052807            | .233634   |
| hisp           | .0485193    | .1590001            | 0.31  | 0.762 | -.2736456            | .3706842  |
| decmaskmandate | -.03367     | .2201659            | -0.15 | 0.879 | -.4797685            | .4124284  |
| car            | .2225888    | .1026857            | 2.17  | 0.037 | .0145278             | .4306499  |
| reactr         | -.1058524   | .0512772            | -2.06 | 0.046 | -.2097499            | -.0019549 |
| ideology       | .0345025    | .0431835            | 0.80  | 0.429 | -.0529955            | .1220005  |
| trumpfavt2     | -.0225103   | .022667             | -0.99 | 0.327 | -.068438             | .0234174  |
| _cons          | 3.463812    | .613162             | 5.65  | 0.000 | 2.221428             | 4.706197  |

**\*\*\*Regressions predicting Favorability (STATA)**

. \*Predicting Favorability  
 . \*Over 50

. reg trumpfavt2 male education age income black hisp party ideology car reactr  
 [pweight=xadj\_over50\_weight] if over50==1  
 (sum of wgt is 1,265.9917)

Linear regression

|               |   |        |
|---------------|---|--------|
| Number of obs | = | 1,233  |
| F(10, 1222)   | = | 123.03 |
| Prob > F      | = | 0.0000 |
| R-squared     | = | 0.6052 |
| Root MSE      | = | 2.5733 |

|            | Coefficient | Robust<br>std. err. | t     | P> t  | [95% conf. interval] |          |
|------------|-------------|---------------------|-------|-------|----------------------|----------|
| trumpfavt2 |             |                     |       |       |                      |          |
| male       | -.37578     | .2698344            | -1.39 | 0.164 | -.9051701            | .15361   |
| education  | -.1004384   | .0702024            | -1.43 | 0.153 | -.2381689            | .0372922 |
| age        | -.0206115   | .0161098            | -1.28 | 0.201 | -.0522174            | .0109943 |
| income     | .0039123    | .0028042            | 1.40  | 0.163 | -.0015893            | .0094139 |
| black      | -.2958128   | .2570832            | -1.15 | 0.250 | -.8001862            | .2085606 |
| hisp       | -.4043979   | .2588294            | -1.56 | 0.118 | -.9121971            | .1034013 |
| party      | 1.122188    | .0748082            | 15.00 | 0.000 | .9754217             | 1.268955 |
| ideology   | .300476     | .0948335            | 3.17  | 0.002 | .1144214             | .4865305 |
| car        | -.2357495   | .1687499            | -1.40 | 0.163 | -.5668212            | .0953221 |
| reactr     | .6185668    | .1586582            | 3.90  | 0.000 | .3072942             | .9298395 |
| _cons      | -.2198227   | 1.857414            | -0.12 | 0.906 | -3.863897            | 3.424252 |

. reg bidenfavt2 male education age income black hisp party ideology car reactr  
 [pweight=xadj\_over50\_weight] if over50==1  
 (sum of wgt is 1,256.5135)

Linear regression

|               |   |        |
|---------------|---|--------|
| Number of obs | = | 1,231  |
| F(10, 1220)   | = | 173.87 |
| Prob > F      | = | 0.0000 |
| R-squared     | = | 0.6511 |
| Root MSE      | = | 2.3862 |

|            | Coefficient | Robust<br>std. err. | t      | P> t  | [95% conf. interval] |           |
|------------|-------------|---------------------|--------|-------|----------------------|-----------|
| bidenfavt2 |             |                     |        |       |                      |           |
| male       | -.0952979   | .2335156            | -0.41  | 0.683 | -.5534346            | .3628389  |
| education  | .034827     | .0673407            | 0.52   | 0.605 | -.0972894            | .1669434  |
| age        | .0271994    | .0143481            | 1.90   | 0.058 | -.0009502            | .055349   |
| income     | -.0031051   | .0025333            | -1.23  | 0.221 | -.0080753            | .0018651  |
| black      | .4815872    | .2342003            | 2.06   | 0.040 | .0221072             | .9410672  |
| hisp       | .3929043    | .2242961            | 1.75   | 0.080 | -.0471446            | .8329532  |
| party      | -1.06076    | .0823217            | -12.89 | 0.000 | -1.222268            | -.8992519 |
| ideology   | -.4254884   | .1027585            | -4.14  | 0.000 | -.6270913            | -.2238855 |
| car        | .2579604    | .1408379            | 1.83   | 0.067 | -.0183509            | .5342717  |
| reactr     | -.7401502   | .1549001            | -4.78  | 0.000 | -1.04405             | -.43625   |
| _cons      | 10.44942    | 1.556015            | 6.72   | 0.000 | 7.396659             | 13.50218  |

. \*Predicting Favorability  
 . \*Under 50

. reg trumpfavt2 male education age income black hisp party ideology car reactr  
 [pweight=xadj\_under50\_weight] if over50==0  
 (sum of wgt is 463.3599)

Linear regression

|               |   |        |
|---------------|---|--------|
| Number of obs | = | 460    |
| F(10, 449)    | = | 6.58   |
| Prob > F      | = | 0.0000 |
| R-squared     | = | 0.3099 |
| Root MSE      | = | 2.9934 |

|            | Coefficient | Robust<br>std. err. | t     | P> t  | [95% conf. interval] |           |
|------------|-------------|---------------------|-------|-------|----------------------|-----------|
| trumpfavt2 |             |                     |       |       |                      |           |
| male       | .666388     | .5349701            | 1.25  | 0.214 | -.3849681            | 1.717744  |
| education  | -.1334892   | .1334918            | -1.00 | 0.318 | -.3958355            | .1288572  |
| age        | -.0761407   | .0326209            | -2.33 | 0.020 | -.1402493            | -.0120321 |
| income     | .0065477    | .0064822            | 1.01  | 0.313 | -.0061916            | .019287   |
| black      | -1.320559   | .5432857            | -2.43 | 0.015 | -2.388258            | -.252861  |
| hisp       | -1.28528    | .5511028            | -2.33 | 0.020 | -2.368341            | -.2022192 |
| party      | .4516559    | .1586484            | 2.85  | 0.005 | .1398702             | .7634415  |
| ideology   | .3705892    | .179682             | 2.06  | 0.040 | .0174671             | .7237113  |
| car        | -.229309    | .3853275            | -0.60 | 0.552 | -.9865783            | .5279602  |
| reactr     | .8527616    | .2705177            | 3.15  | 0.002 | .3211236             | 1.3844    |
| _cons      | 2.890187    | 2.70428             | 1.07  | 0.286 | -2.42443             | 8.204804  |

. reg bidenfavt2 male education age income black hisp party ideology car reactr  
 [pweight=xadj\_under50\_weight] if over50==0  
 (sum of wgt is 463.7022)

Linear regression

|               |   |        |
|---------------|---|--------|
| Number of obs | = | 461    |
| F(10, 450)    | = | 11.33  |
| Prob > F      | = | 0.0000 |
| R-squared     | = | 0.3088 |
| Root MSE      | = | 2.922  |

|            | Coefficient | Robust<br>std. err. | t     | P> t  | [95% conf. interval] |           |
|------------|-------------|---------------------|-------|-------|----------------------|-----------|
| bidenfavt2 |             |                     |       |       |                      |           |
| male       | .3907304    | .4723719            | 0.83  | 0.409 | -.5375983            | 1.319059  |
| education  | .0996665    | .1048522            | 0.95  | 0.342 | -.1063943            | .3057272  |
| age        | .0276164    | .0275041            | 1.00  | 0.316 | -.0264361            | .0816688  |
| income     | .0087189    | .0066038            | 1.32  | 0.187 | -.0042592            | .0216969  |
| black      | 1.107222    | .5659036            | 1.96  | 0.051 | -.0049201            | 2.219364  |
| hisp       | .5276834    | .5713066            | 0.92  | 0.356 | -.5950767            | 1.650443  |
| party      | -.4271515   | .148297             | -2.88 | 0.004 | -.7185922            | -.1357109 |
| ideology   | -.5848385   | .1664841            | -3.51 | 0.000 | -.9120213            | -.2576558 |
| car        | .2714571    | .4827628            | 0.56  | 0.574 | -.6772922            | 1.220206  |
| reactr     | .4928238    | .2767098            | 1.78  | 0.076 | -.0509801            | 1.036628  |
| _cons      | 2.980349    | 2.856046            | 1.04  | 0.297 | -2.632496            | 8.593193  |

## Mediation and Moderation syntax/output from Hayes PROCESS macro (copyright 2017 – 2020) run in SPSS

### \*\*\*\*MEDIATION ANALYSES

```
USE ALL.
COMPUTE filter_$=((OVER50 = 0) AND (xconfirm = 1)).
VARIABLE LABELS filter_$ '(OVER50 = 0) AND (xconfirm = 1) (FILTER)'.
VALUE LABELS filter_$ 0 'Not Selected' 1 'Selected'.
FORMATS filter_$ (f1.0).
FILTER BY filter_$.
EXECUTE.
```

\*Assigning weights to under 50 age group

```
DATASET ACTIVATE DataSet1.
WEIGHT BY xadj_under50_weight.
* Encoding: UTF-8.
```

```
/* PROCESS version 3.5 */.
/* Written by Andrew F. Hayes */.
/* www.afhayes.com */.
/* www.processmacro.org */.
/* Copyright 2017-2020 by Andrew F. Hayes */.
/* Documented in http://www.guilford.com/p/hayes3 */.
/* PROCESS workshop schedule at http://www.processmacro.org/workshops.html
*/.
```

```
/* THIS SOFTWARE IS PROVIDED "AS IS", WITHOUT WARRANTY OF ANY KIND */.
/* EXPRESS OR IMPLIED, INCLUDING BUT NOT LIMITED TO THE WARRANTIES OF */.
/* MERCHANTABILITY, FITNESS FOR A PARTICULAR PURPOSE AND NONINFRINGEMENT */.
/* IN NO EVENT SHALL THE COPYRIGHT HOLDERS BE LIABLE FOR ANY CLAIM, */.
/* DAMAGES OR OTHER LIABILITY, WHETHER IN AN ACTION OF CONTRACT, TORT */.
/* OR OTHERWISE, ARISING FROM, OUT OF OR IN CONNECTION WITH THE */.
/* SOFTWARE OR THE USE OR OTHER DEALINGS IN THE SOFTWARE */.
/* USE OF THIS SOFTWARE IMPLIES AGREEMENT WITH THESE TERMS */.
```

```
set printback=off.
```

Run MATRIX procedure:

```
***** PROCESS Procedure for SPSS Version 3.5 *****
```

```
Written by Andrew F. Hayes, Ph.D. www.afhayes.com
Documentation available in Hayes (2018). www.guilford.com/p/hayes3
```

```
*****
```

```
Model : 4
Y : Mask_T2
X : CAr
M : TrumpT2
```

Covariates:  
 ideology black hisp male educ age income

Sample  
 Size: 462

\*\*\*\*\*

OUTCOME VARIABLE:  
 TrumpT2

Model Summary

| R     | R-sq  | MSE    | F       | df1    | df2      | p     |
|-------|-------|--------|---------|--------|----------|-------|
| .4493 | .2018 | 9.8262 | 14.3198 | 8.0000 | 453.0000 | .0000 |

Model

|          | coeff   | se     | t       | p     | LLCI    | ULCI   |
|----------|---------|--------|---------|-------|---------|--------|
| constant | 6.3648  | 1.5694 | 4.0555  | .0001 | 3.2806  | 9.4491 |
| CAR      | -.7477  | .1950  | -3.8348 | .0001 | -1.1309 | -.3645 |
| ideology | .6943   | .0923  | 7.5193  | .0000 | .5128   | .8758  |
| black    | -1.3459 | .3436  | -3.9175 | .0001 | -2.0211 | -.6707 |
| hisp     | -.4231  | .3530  | -1.1986 | .2313 | -1.1168 | .2706  |
| male     | .2725   | .3291  | .8281   | .4080 | -.3742  | .9192  |
| educ     | -.1332  | .0834  | -1.5963 | .1111 | -.2971  | .0308  |
| age      | -.0395  | .0215  | -1.8395 | .0665 | -.0818  | .0027  |
| income   | .0067   | .0037  | 1.8021  | .0722 | -.0006  | .0140  |

\*\*\*\*\*

OUTCOME VARIABLE:  
 Mask\_T2

Model Summary

| R     | R-sq  | MSE   | F      | df1    | df2      | p     |
|-------|-------|-------|--------|--------|----------|-------|
| .3076 | .0946 | .6630 | 5.2497 | 9.0000 | 452.0000 | .0000 |

Model

|          | coeff  | se    | t       | p     | LLCI   | ULCI   |
|----------|--------|-------|---------|-------|--------|--------|
| constant | 3.8009 | .4150 | 9.1587  | .0000 | 2.9853 | 4.6165 |
| CAR      | .1219  | .0515 | 2.3689  | .0183 | .0208  | .2231  |
| TrumpT2  | -.0576 | .0122 | -4.7166 | .0000 | -.0815 | -.0336 |
| ideology | .0200  | .0254 | .7865   | .4320 | -.0300 | .0700  |
| black    | -.0184 | .0907 | -.2024  | .8397 | -.1967 | .1600  |
| hisp     | -.0255 | .0918 | -.2776  | .7815 | -.2060 | .1550  |
| male     | -.1130 | .0855 | -1.3212 | .1871 | -.2811 | .0551  |
| educ     | .0079  | .0217 | .3626   | .7170 | -.0348 | .0506  |
| age      | .0055  | .0056 | .9748   | .3302 | -.0056 | .0165  |
| income   | .0015  | .0010 | 1.4948  | .1357 | -.0005 | .0034  |

\*\*\*\*\* TOTAL EFFECT MODEL \*\*\*\*\*

OUTCOME VARIABLE:  
 Mask\_T2

Model Summary

| R     | R-sq  | MSE   | F      | df1    | df2      | p     |
|-------|-------|-------|--------|--------|----------|-------|
| .2238 | .0501 | .6941 | 2.9851 | 8.0000 | 453.0000 | .0029 |

Model

| coeff | se | t | p | LLCI | ULCI |
|-------|----|---|---|------|------|
|-------|----|---|---|------|------|

|          |        |       |         |       |        |        |
|----------|--------|-------|---------|-------|--------|--------|
| constant | 3.4345 | .4171 | 8.2338  | .0000 | 2.6148 | 4.2543 |
| CAR      | .1650  | .0518 | 3.1830  | .0016 | .0631  | .2668  |
| ideology | -.0200 | .0245 | -.8133  | .4165 | -.0682 | .0283  |
| black    | .0591  | .0913 | .6474   | .5177 | -.1203 | .2386  |
| hisp     | -.0011 | .0938 | -.0121  | .9903 | -.1855 | .1832  |
| male     | -.1287 | .0875 | -1.4716 | .1418 | -.3006 | .0432  |
| educ     | .0155  | .0222 | .7012   | .4836 | -.0280 | .0591  |
| age      | .0077  | .0057 | 1.3547  | .1762 | -.0035 | .0190  |
| income   | .0011  | .0010 | 1.0759  | .2826 | -.0009 | .0030  |

\*\*\*\*\* TOTAL, DIRECT, AND INDIRECT EFFECTS OF X ON Y \*\*\*\*\*

|                        |        |       |        |       |       |       |       |
|------------------------|--------|-------|--------|-------|-------|-------|-------|
| Total effect of X on Y |        |       |        |       |       |       |       |
|                        | Effect | se    | t      | p     | LLCI  | ULCI  | c_ps  |
| c_cs                   | .1650  | .0518 | 3.1830 | .0016 | .0631 | .2668 | .1947 |
|                        | .1550  |       |        |       |       |       |       |

|                         |        |       |        |       |       |       |       |
|-------------------------|--------|-------|--------|-------|-------|-------|-------|
| Direct effect of X on Y |        |       |        |       |       |       |       |
|                         | Effect | se    | t      | p     | LLCI  | ULCI  | c'_ps |
| c'_cs                   | .1219  | .0515 | 2.3689 | .0183 | .0208 | .2231 | .1439 |
|                         | .1146  |       |        |       |       |       |       |

|                               |        |        |          |          |
|-------------------------------|--------|--------|----------|----------|
| Indirect effect(s) of X on Y: |        |        |          |          |
|                               | Effect | BootSE | BootLLCI | BootULCI |
| TrumpT2                       | .0430  | .0162  | .0163    | .0793    |

|                                                      |        |        |          |          |
|------------------------------------------------------|--------|--------|----------|----------|
| Partially standardized indirect effect(s) of X on Y: |        |        |          |          |
|                                                      | Effect | BootSE | BootLLCI | BootULCI |
| TrumpT2                                              | .0508  | .0188  | .0194    | .0926    |

|                                                       |        |        |          |          |
|-------------------------------------------------------|--------|--------|----------|----------|
| Completely standardized indirect effect(s) of X on Y: |        |        |          |          |
|                                                       | Effect | BootSE | BootLLCI | BootULCI |
| TrumpT2                                               | .0404  | .0148  | .0153    | .0732    |

\*\*\*\*\* ANALYSIS NOTES AND ERRORS \*\*\*\*\*

Level of confidence for all confidence intervals in output:  
95.0000

Number of bootstrap samples for percentile bootstrap confidence intervals:  
5000

----- END MATRIX -----

\* Encoding: UTF-8.

/\* PROCESS version 3.5 \*/.  
 /\* Written by Andrew F. Hayes \*/.  
 /\* www.afhayes.com \*/.  
 /\* www.processmacro.org \*/.  
 /\* Copyright 2017-2020 by Andrew F. Hayes \*/.  
 /\* Documented in <http://www.guilford.com/p/hayes3> \*/.

```
/* PROCESS workshop schedule at http://www.processmacro.org/workshops.html
*/.
```

```
/* THIS SOFTWARE IS PROVIDED "AS IS", WITHOUT WARRANTY OF ANY KIND */.
/* EXPRESS OR IMPLIED, INCLUDING BUT NOT LIMITED TO THE WARRANTIES OF */.
/* MERCHANTABILITY, FITNESS FOR A PARTICULAR PURPOSE AND NONINFRINGEMENT */.
/* IN NO EVENT SHALL THE COPYRIGHT HOLDERS BE LIABLE FOR ANY CLAIM, */.
/* DAMAGES OR OTHER LIABILITY, WHETHER IN AN ACTION OF CONTRACT, TORT */.
/* OR OTHERWISE, ARISING FROM, OUT OF OR IN CONNECTION WITH THE */.
/* SOFTWARE OR THE USE OR OTHER DEALINGS IN THE SOFTWARE */.
/* USE OF THIS SOFTWARE IMPLIES AGREEMENT WITH THESE TERMS */.
```

```
set printback=off.
```

```
Run MATRIX procedure:
```

```
***** PROCESS Procedure for SPSS Version 3.5 *****
```

```
Written by Andrew F. Hayes, Ph.D. www.afhayes.com
Documentation available in Hayes (2018). www.guilford.com/p/hayes3
```

```
*****
```

```
Model : 4
Y : Mask_T2
X : CAr
M : BidenT2
```

```
Covariates:
```

```
ideology black hisp male educ age income
```

```
Sample
```

```
Size: 463
```

```
*****
```

```
OUTCOME VARIABLE:
```

```
BidenT2
```

```
Model Summary
```

|  | R     | R-sq  | MSE    | F       | df1    | df2      | p     |
|--|-------|-------|--------|---------|--------|----------|-------|
|  | .4635 | .2149 | 9.3538 | 15.5308 | 8.0000 | 454.0000 | .0000 |

```
Model
```

|          | coeff  | se     | t        | p     | LLCI    | ULCI   |
|----------|--------|--------|----------|-------|---------|--------|
| constant | 5.7736 | 1.5290 | 3.7761   | .0002 | 2.7689  | 8.7784 |
| CAr      | .2509  | .1904  | 1.3178   | .1882 | -.1233  | .6251  |
| ideology | -.9115 | .0901  | -10.1195 | .0000 | -1.0885 | -.7345 |
| black    | .9123  | .3340  | 2.7317   | .0065 | .2560   | 1.5687 |
| hisp     | -.1467 | .3443  | -.4261   | .6703 | -.8234  | .5300  |
| male     | .1921  | .3205  | .5994    | .5492 | -.4378  | .8220  |
| educ     | .0281  | .0813  | .3454    | .7300 | -.1317  | .1878  |
| age      | .0340  | .0209  | 1.6309   | .1036 | -.0070  | .0750  |
| income   | .0034  | .0036  | .9256    | .3551 | -.0038  | .0105  |

```
*****
```

```
OUTCOME VARIABLE:
```



Mask\_T2

Model Summary

| R     | R-sq  | MSE   | F      | df1    | df2      | p     |
|-------|-------|-------|--------|--------|----------|-------|
| .3387 | .1147 | .6550 | 6.5233 | 9.0000 | 453.0000 | .0000 |

Model

|          | coeff  | se    | t       | p     | LLCI   | ULCI   |
|----------|--------|-------|---------|-------|--------|--------|
| constant | 2.9881 | .4109 | 7.2718  | .0000 | 2.1806 | 3.7957 |
| CAR      | .1535  | .0505 | 3.0402  | .0025 | .0543  | .2527  |
| BidenT2  | .0713  | .0124 | 5.7395  | .0000 | .0469  | .0957  |
| ideology | .0464  | .0264 | 1.7573  | .0795 | -.0055 | .0982  |
| black    | -.0186 | .0891 | -.2085  | .8349 | -.1937 | .1565  |
| hisp     | .0145  | .0911 | .1587   | .8739 | -.1646 | .1936  |
| male     | -.1382 | .0848 | -1.6285 | .1041 | -.3049 | .0286  |
| educ     | .0108  | .0215 | .5002   | .6172 | -.0315 | .0530  |
| age      | .0066  | .0055 | 1.1905  | .2345 | -.0043 | .0175  |
| income   | .0008  | .0010 | .8224   | .4113 | -.0011 | .0027  |

\*\*\*\*\* TOTAL EFFECT MODEL \*\*\*\*\*

OUTCOME VARIABLE:

Mask\_T2

Model Summary

| R     | R-sq  | MSE   | F      | df1    | df2      | p     |
|-------|-------|-------|--------|--------|----------|-------|
| .2244 | .0504 | .7011 | 3.0093 | 8.0000 | 454.0000 | .0027 |

Model

|          | coeff  | se    | t       | p     | LLCI   | ULCI   |
|----------|--------|-------|---------|-------|--------|--------|
| constant | 3.3997 | .4186 | 8.1215  | .0000 | 2.5770 | 4.2223 |
| CAR      | .1714  | .0521 | 3.2873  | .0011 | .0689  | .2738  |
| ideology | -.0186 | .0247 | -.7543  | .4510 | -.0671 | .0299  |
| black    | .0465  | .0914 | .5080   | .6117 | -.1332 | .2261  |
| hisp     | .0040  | .0943 | .0425   | .9661 | -.1813 | .1893  |
| male     | -.1245 | .0877 | -1.4186 | .1567 | -.2969 | .0480  |
| educ     | .0128  | .0223 | .5735   | .5666 | -.0310 | .0565  |
| age      | .0090  | .0057 | 1.5787  | .1151 | -.0022 | .0202  |
| income   | .0010  | .0010 | 1.0367  | .3004 | -.0009 | .0030  |

\*\*\*\*\* TOTAL, DIRECT, AND INDIRECT EFFECTS OF X ON Y \*\*\*\*\*

Total effect of X on Y

| Effect | se    | t     | p      | LLCI  | ULCI  | c_ps  |
|--------|-------|-------|--------|-------|-------|-------|
| c_cs   | .1714 | .0521 | 3.2873 | .0011 | .0689 | .2738 |
|        | .1598 |       |        |       |       | .2012 |

Direct effect of X on Y

| Effect | se    | t     | p      | LLCI  | ULCI  | c'_ps |
|--------|-------|-------|--------|-------|-------|-------|
| c'_cs  | .1535 | .0505 | 3.0402 | .0025 | .0543 | .2527 |
|        | .1431 |       |        |       |       | .1802 |

Indirect effect(s) of X on Y:

|         | Effect | BootSE | BootLLCI | BootULCI |
|---------|--------|--------|----------|----------|
| BidenT2 | .0179  | .0150  | -.0092   | .0500    |

Partially standardized indirect effect(s) of X on Y:

|         | Effect | BootSE | BootLLCI | BootULCI |
|---------|--------|--------|----------|----------|
| BidenT2 | .0210  | .0173  | -.0112   | .0572    |

Completely standardized indirect effect(s) of X on Y:

|         | Effect | BootSE | BootLLCI | BootULCI |
|---------|--------|--------|----------|----------|
| BidenT2 | .0167  | .0137  | -.0088   | .0453    |

\*\*\*\*\* ANALYSIS NOTES AND ERRORS \*\*\*\*\*

Level of confidence for all confidence intervals in output:  
95.0000

Number of bootstrap samples for percentile bootstrap confidence intervals:  
5000

----- END MATRIX -----

\* Encoding: UTF-8.

/\* PROCESS version 3.5 \*/.  
/\* Written by Andrew F. Hayes \*/.  
/\* www.afhayes.com \*/.  
/\* www.processmacro.org \*/.  
/\* Copyright 2017-2020 by Andrew F. Hayes \*/.  
/\* Documented in <http://www.guilford.com/p/hayes3> \*/.  
/\* PROCESS workshop schedule at <http://www.processmacro.org/workshops.html> \*/.  
\*/.

/\* THIS SOFTWARE IS PROVIDED "AS IS", WITHOUT WARRANTY OF ANY KIND \*/.  
/\* EXPRESS OR IMPLIED, INCLUDING BUT NOT LIMITED TO THE WARRANTIES OF \*/.  
/\* MERCHANTABILITY, FITNESS FOR A PARTICULAR PURPOSE AND NONINFRINGEMENT \*/.  
/\* IN NO EVENT SHALL THE COPYRIGHT HOLDERS BE LIABLE FOR ANY CLAIM, \*/.  
/\* DAMAGES OR OTHER LIABILITY, WHETHER IN AN ACTION OF CONTRACT, TORT \*/.  
/\* OR OTHERWISE, ARISING FROM, OUT OF OR IN CONNECTION WITH THE \*/.  
/\* SOFTWARE OR THE USE OR OTHER DEALINGS IN THE SOFTWARE \*/.  
/\* USE OF THIS SOFTWARE IMPLIES AGREEMENT WITH THESE TERMS \*/.

set printback=off.

Run MATRIX procedure:

\*\*\*\*\* PROCESS Procedure for SPSS Version 3.5 \*\*\*\*\*

Written by Andrew F. Hayes, Ph.D.                      www.afhayes.com  
Documentation available in Hayes (2018). [www.guilford.com/p/hayes3](http://www.guilford.com/p/hayes3)

\*\*\*\*\*

Model : 4  
Y : Mask\_T2  
X : Reactr  
M : BidenT2

Covariates:  
 ideology black hisp male educ age income

Sample  
 Size: 464

\*\*\*\*\*

OUTCOME VARIABLE:  
 BidenT2

Model Summary

| R     | R-sq  | MSE    | F       | df1    | df2      | p     |
|-------|-------|--------|---------|--------|----------|-------|
| .4587 | .2104 | 9.3522 | 15.1516 | 8.0000 | 455.0000 | .0000 |

Model

|          | coeff  | se     | t        | p     | LLCI    | ULCI   |
|----------|--------|--------|----------|-------|---------|--------|
| constant | 6.2594 | 1.4854 | 4.2139   | .0000 | 3.3403  | 9.1786 |
| Reactr   | .0835  | .1820  | .4586    | .6468 | -.2742  | .4411  |
| ideology | -.9012 | .0901  | -10.0058 | .0000 | -1.0782 | -.7242 |
| black    | .9519  | .3344  | 2.8464   | .0046 | .2947   | 1.6091 |
| hisp     | -.1786 | .3443  | -.5188   | .6042 | -.8551  | .4979  |
| male     | .0534  | .3043  | .1754    | .8608 | -.5446  | .6513  |
| educ     | .0347  | .0812  | .4273    | .6693 | -.1249  | .1943  |
| age      | .0365  | .0206  | 1.7691   | .0776 | -.0040  | .0771  |
| income   | .0025  | .0036  | .6943    | .4879 | -.0046  | .0097  |

\*\*\*\*\*

OUTCOME VARIABLE:  
 Mask\_T2

Model Summary

| R     | R-sq  | MSE   | F      | df1    | df2      | p     |
|-------|-------|-------|--------|--------|----------|-------|
| .3118 | .0972 | .6686 | 5.4313 | 9.0000 | 454.0000 | .0000 |

Model

|          | coeff  | se    | t       | p     | LLCI   | ULCI   |
|----------|--------|-------|---------|-------|--------|--------|
| constant | 3.5188 | .4049 | 8.6916  | .0000 | 2.7232 | 4.3145 |
| Reactr   | -.0092 | .0487 | -.1888  | .8504 | -.1048 | .0865  |
| BidenT2  | .0741  | .0125 | 5.9084  | .0000 | .0494  | .0987  |
| ideology | .0463  | .0266 | 1.7410  | .0824 | -.0060 | .0986  |
| black    | -.0142 | .0902 | -.1569  | .8754 | -.1914 | .1631  |
| hisp     | -.0081 | .0921 | -.0881  | .9298 | -.1891 | .1728  |
| male     | -.2190 | .0814 | -2.6921 | .0074 | -.3789 | -.0591 |
| educ     | .0150  | .0217 | .6901   | .4905 | -.0277 | .0577  |
| age      | .0065  | .0055 | 1.1726  | .2416 | -.0044 | .0174  |
| income   | .0006  | .0010 | .6334   | .5268 | -.0013 | .0025  |

\*\*\*\*\* TOTAL EFFECT MODEL \*\*\*\*\*

OUTCOME VARIABLE:  
 Mask\_T2

Model Summary

| R     | R-sq  | MSE   | F      | df1    | df2      | p     |
|-------|-------|-------|--------|--------|----------|-------|
| .1667 | .0278 | .7185 | 1.6254 | 8.0000 | 455.0000 | .1151 |

Model

|  | coeff | se | t | p | LLCI | ULCI |
|--|-------|----|---|---|------|------|
|--|-------|----|---|---|------|------|

|          |        |       |         |       |        |        |
|----------|--------|-------|---------|-------|--------|--------|
| constant | 3.9824 | .4117 | 9.6728  | .0000 | 3.1733 | 4.7915 |
| Reactr   | -.0030 | .0504 | -.0596  | .9525 | -.1021 | .0961  |
| ideology | -.0204 | .0250 | -.8185  | .4135 | -.0695 | .0286  |
| black    | .0563  | .0927 | .6078   | .5436 | -.1258 | .2385  |
| hisp     | -.0213 | .0954 | -.2237  | .8231 | -.2089 | .1662  |
| male     | -.2151 | .0843 | -2.5503 | .0111 | -.3808 | -.0493 |
| educ     | .0176  | .0225 | .7800   | .4358 | -.0267 | .0618  |
| age      | .0092  | .0057 | 1.6078  | .1086 | -.0020 | .0204  |
| income   | .0008  | .0010 | .7968   | .4260 | -.0012 | .0028  |

\*\*\*\*\* TOTAL, DIRECT, AND INDIRECT EFFECTS OF X ON Y \*\*\*\*\*

|                        |        |       |        |       |        |       |        |
|------------------------|--------|-------|--------|-------|--------|-------|--------|
| Total effect of X on Y |        |       |        |       |        |       |        |
|                        | Effect | se    | t      | p     | LLCI   | ULCI  | c_ps   |
| c_cs                   | -.0030 | .0504 | -.0596 | .9525 | -.1021 | .0961 | -.0035 |
|                        | -.0028 |       |        |       |        |       |        |

|                         |        |       |        |       |        |       |        |
|-------------------------|--------|-------|--------|-------|--------|-------|--------|
| Direct effect of X on Y |        |       |        |       |        |       |        |
|                         | Effect | se    | t      | p     | LLCI   | ULCI  | c'_ps  |
| c'_cs                   | -.0092 | .0487 | -.1888 | .8504 | -.1048 | .0865 | -.0108 |
|                         | -.0085 |       |        |       |        |       |        |

|                               |        |        |          |          |
|-------------------------------|--------|--------|----------|----------|
| Indirect effect(s) of X on Y: |        |        |          |          |
|                               | Effect | BootSE | BootLLCI | BootULCI |
| BidenT2                       | .0062  | .0150  | -.0231   | .0358    |

|                                                      |        |        |          |          |
|------------------------------------------------------|--------|--------|----------|----------|
| Partially standardized indirect effect(s) of X on Y: |        |        |          |          |
|                                                      | Effect | BootSE | BootLLCI | BootULCI |
| BidenT2                                              | .0073  | .0175  | -.0270   | .0411    |

|                                                       |        |        |          |          |
|-------------------------------------------------------|--------|--------|----------|----------|
| Completely standardized indirect effect(s) of X on Y: |        |        |          |          |
|                                                       | Effect | BootSE | BootLLCI | BootULCI |
| BidenT2                                               | .0057  | .0137  | -.0215   | .0320    |

\*\*\*\*\* ANALYSIS NOTES AND ERRORS \*\*\*\*\*

Level of confidence for all confidence intervals in output:  
95.0000

Number of bootstrap samples for percentile bootstrap confidence intervals:  
5000

----- END MATRIX -----

\* Encoding: UTF-8.

/\* PROCESS version 3.5 \*/.  
 /\* Written by Andrew F. Hayes \*/.  
 /\* www.afhayes.com \*/.  
 /\* www.processmacro.org \*/.  
 /\* Copyright 2017-2020 by Andrew F. Hayes \*/.  
 /\* Documented in <http://www.guilford.com/p/hayes3> \*/.

```
/* PROCESS workshop schedule at http://www.processmacro.org/workshops.html
*/.
```

```
/* THIS SOFTWARE IS PROVIDED "AS IS", WITHOUT WARRANTY OF ANY KIND */.
/* EXPRESS OR IMPLIED, INCLUDING BUT NOT LIMITED TO THE WARRANTIES OF */.
/* MERCHANTABILITY, FITNESS FOR A PARTICULAR PURPOSE AND NONINFRINGEMENT */.
/* IN NO EVENT SHALL THE COPYRIGHT HOLDERS BE LIABLE FOR ANY CLAIM, */.
/* DAMAGES OR OTHER LIABILITY, WHETHER IN AN ACTION OF CONTRACT, TORT */.
/* OR OTHERWISE, ARISING FROM, OUT OF OR IN CONNECTION WITH THE */.
/* SOFTWARE OR THE USE OR OTHER DEALINGS IN THE SOFTWARE */.
/* USE OF THIS SOFTWARE IMPLIES AGREEMENT WITH THESE TERMS */.
```

```
set printback=off.
```

```
Run MATRIX procedure:
```

```
***** PROCESS Procedure for SPSS Version 3.5 *****
```

```
Written by Andrew F. Hayes, Ph.D. www.afhayes.com
Documentation available in Hayes (2018). www.guilford.com/p/hayes3
```

```
*****
```

```
Model : 4
Y : Mask_T2
X : Reactr
M : TrumpT2
```

```
Covariates:
```

```
ideology black hisp male educ age income
```

```
Sample
```

```
Size: 463
```

```
*****
```

```
OUTCOME VARIABLE:
```

```
TrumpT2
```

```
Model Summary
```

|  | R     | R-sq  | MSE     | F       | df1    | df2      | p     |
|--|-------|-------|---------|---------|--------|----------|-------|
|  | .4396 | .1933 | 10.0051 | 13.5944 | 8.0000 | 454.0000 | .0000 |

```
Model
```

|          | coeff   | se     | t       | p     | LLCI    | ULCI   |
|----------|---------|--------|---------|-------|---------|--------|
| constant | 2.4722  | 1.5447 | 1.6004  | .1102 | -.5635  | 5.5079 |
| Reactr   | .5555   | .1875  | 2.9622  | .0032 | .1870   | .9241  |
| ideology | .6950   | .0931  | 7.4614  | .0000 | .5119   | .8780  |
| black    | -1.2631 | .3473  | -3.6364 | .0003 | -1.9457 | -.5805 |
| hisp     | -.2702  | .3560  | -.7591  | .4482 | -.9698  | .4294  |
| male     | .7653   | .3139  | 2.4379  | .0152 | .1484   | 1.3822 |
| educ     | -.1571  | .0841  | -1.8676 | .0625 | -.3223  | .0082  |
| age      | -.0481  | .0215  | -2.2395 | .0256 | -.0904  | -.0059 |
| income   | .0070   | .0038  | 1.8603  | .0635 | -.0004  | .0144  |

```
*****
```

```
OUTCOME VARIABLE:
```

Mask\_T2

Model Summary

| R     | R-sq  | MSE   | F      | df1    | df2      | p     |
|-------|-------|-------|--------|--------|----------|-------|
| .2916 | .0850 | .6707 | 4.6776 | 9.0000 | 453.0000 | .0000 |

Model

|          | coeff  | se    | t       | p     | LLCI   | ULCI   |
|----------|--------|-------|---------|-------|--------|--------|
| constant | 4.1414 | .4011 | 10.3255 | .0000 | 3.3532 | 4.9296 |
| Reactr   | .0365  | .0490 | .7440   | .4573 | -.0599 | .1328  |
| TrumpT2  | -.0640 | .0122 | -5.2695 | .0000 | -.0879 | -.0402 |
| ideology | .0223  | .0256 | .8709   | .3843 | -.0280 | .0725  |
| black    | -.0056 | .0912 | -.0612  | .9513 | -.1849 | .1737  |
| hisp     | -.0484 | .0922 | -.5243  | .6003 | -.2296 | .1329  |
| male     | -.1608 | .0818 | -1.9658 | .0499 | -.3216 | .0000  |
| educ     | .0104  | .0219 | .4750   | .6350 | -.0326 | .0533  |
| age      | .0047  | .0056 | .8441   | .3991 | -.0063 | .0157  |
| income   | .0013  | .0010 | 1.3309  | .1839 | -.0006 | .0032  |

\*\*\*\*\* TOTAL EFFECT MODEL \*\*\*\*\*

OUTCOME VARIABLE:

Mask\_T2

Model Summary

| R     | R-sq  | MSE   | F      | df1    | df2      | p     |
|-------|-------|-------|--------|--------|----------|-------|
| .1701 | .0289 | .7103 | 1.6916 | 8.0000 | 454.0000 | .0981 |

Model

|          | coeff  | se    | t       | p     | LLCI   | ULCI   |
|----------|--------|-------|---------|-------|--------|--------|
| constant | 3.9831 | .4116 | 9.6776  | .0000 | 3.1743 | 4.7919 |
| Reactr   | .0009  | .0500 | .0181   | .9856 | -.0973 | .0991  |
| ideology | -.0222 | .0248 | -.8964  | .3705 | -.0710 | .0265  |
| black    | .0753  | .0925 | .8136   | .4163 | -.1066 | .2572  |
| hisp     | -.0311 | .0949 | -.3274  | .7435 | -.2175 | .1553  |
| male     | -.2098 | .0836 | -2.5087 | .0125 | -.3742 | -.0455 |
| educ     | .0204  | .0224 | .9122   | .3622 | -.0236 | .0645  |
| age      | .0078  | .0057 | 1.3630  | .1736 | -.0034 | .0191  |
| income   | .0009  | .0010 | .8511   | .3952 | -.0011 | .0028  |

\*\*\*\*\* TOTAL, DIRECT, AND INDIRECT EFFECTS OF X ON Y \*\*\*\*\*

Total effect of X on Y

| Effect | se    | t     | p     | LLCI  | ULCI   | c_ps  |       |
|--------|-------|-------|-------|-------|--------|-------|-------|
| c_cs   | .0009 | .0500 | .0181 | .9856 | -.0973 | .0991 | .0011 |
|        | .0008 |       |       |       |        |       |       |

Direct effect of X on Y

| Effect | se    | t     | p     | LLCI  | ULCI   | c'_ps |       |
|--------|-------|-------|-------|-------|--------|-------|-------|
| c'_cs  | .0365 | .0490 | .7440 | .4573 | -.0599 | .1328 | .0430 |
|        | .0340 |       |       |       |        |       |       |

Indirect effect(s) of X on Y:

|         | Effect | BootSE | BootLLCI | BootULCI |
|---------|--------|--------|----------|----------|
| TrumpT2 | -.0356 | .0156  | -.0687   | -.0084   |

Partially standardized indirect effect(s) of X on Y:

|         | Effect | BootSE | BootLLCI | BootULCI |
|---------|--------|--------|----------|----------|
| TrumpT2 | -.0420 | .0184  | -.0811   | -.0098   |

Completely standardized indirect effect(s) of X on Y:

|         | Effect | BootSE | BootLLCI | BootULCI |
|---------|--------|--------|----------|----------|
| TrumpT2 | -.0331 | .0145  | -.0639   | -.0078   |

\*\*\*\*\* ANALYSIS NOTES AND ERRORS \*\*\*\*\*

Level of confidence for all confidence intervals in output:

95.0000

Number of bootstrap samples for percentile bootstrap confidence intervals:

5000

----- END MATRIX -----

\*SELECTING ONLY over 50

USE ALL.

COMPUTE filter\_\$(=(OVER50 = 1) AND (xconfirm = 1)).

VARIABLE LABELS filter\_\$( '(OVER50 = 1) AND (xconfirm = 1) (FILTER)'.

VALUE LABELS filter\_\$( 0 'Not Selected' 1 'Selected'.

FORMATS filter\_\$( f1.0).

FILTER BY filter\_\$(.

EXECUTE.

\*Weights for over 50 age group

DATASET ACTIVATE DataSet1.

WEIGHT BY xadj\_over50\_weight.

\* Encoding: UTF-8.

/\* PROCESS version 3.5 \*/.

/\* Written by Andrew F. Hayes \*/.

/\* www.afhayes.com \*/.

/\* www.processmacro.org \*/.

/\* Copyright 2017-2020 by Andrew F. Hayes \*/.

/\* Documented in <http://www.guilford.com/p/hayes3> \*/.

/\* PROCESS workshop schedule at <http://www.processmacro.org/workshops.html>

\*/.

/\* THIS SOFTWARE IS PROVIDED "AS IS", WITHOUT WARRANTY OF ANY KIND \*/.

/\* EXPRESS OR IMPLIED, INCLUDING BUT NOT LIMITED TO THE WARRANTIES OF \*/.

/\* MERCHANTABILITY, FITNESS FOR A PARTICULAR PURPOSE AND NONINFRINGEMENT \*/.

/\* IN NO EVENT SHALL THE COPYRIGHT HOLDERS BE LIABLE FOR ANY CLAIM, \*/.

/\* DAMAGES OR OTHER LIABILITY, WHETHER IN AN ACTION OF CONTRACT, TORT \*/.

/\* OR OTHERWISE, ARISING FROM, OUT OF OR IN CONNECTION WITH THE \*/.

/\* SOFTWARE OR THE USE OR OTHER DEALINGS IN THE SOFTWARE \*/.

/\* USE OF THIS SOFTWARE IMPLIES AGREEMENT WITH THESE TERMS \*/.

set printback=off.

Run MATRIX procedure:

\*\*\*\*\* PROCESS Procedure for SPSS Version 3.5 \*\*\*\*\*

Written by Andrew F. Hayes, Ph.D. www.afhayes.com  
Documentation available in Hayes (2018). www.guilford.com/p/hayes3

\*\*\*\*\*

Model : 4  
Y : Mask\_T2  
X : Reactr  
M : TrumpT2

Covariates:

ideology black hisp male educ age income

Sample

Size: 1240

\*\*\*\*\*

OUTCOME VARIABLE:

TrumpT2

Model Summary

| R     | R-sq  | MSE    | F        | df1    | df2       | p     |
|-------|-------|--------|----------|--------|-----------|-------|
| .6371 | .4058 | 8.5380 | 105.1028 | 8.0000 | 1231.0000 | .0000 |

Model

|          | coeff   | se     | t       | p     | LLCI    | ULCI    |
|----------|---------|--------|---------|-------|---------|---------|
| constant | -2.3013 | 1.1291 | -2.0382 | .0417 | -4.5165 | -.0861  |
| Reactr   | .7132   | .1204  | 5.9249  | .0000 | .4770   | .9493   |
| ideology | 1.1999  | .0522  | 23.0063 | .0000 | 1.0976  | 1.3022  |
| black    | -1.7645 | .2091  | -8.4402 | .0000 | -2.1746 | -1.3543 |
| hisp     | -.2220  | .2069  | -1.0732 | .2834 | -.6279  | .1838   |
| male     | .1220   | .1741  | .7006   | .4837 | -.2196  | .4635   |
| educ     | -.0401  | .0469  | -.8556  | .3924 | -.1322  | .0519   |
| age      | -.0150  | .0117  | -1.2837 | .1995 | -.0380  | .0079   |
| income   | .0018   | .0020  | .9260   | .3546 | -.0020  | .0057   |

\*\*\*\*\*

OUTCOME VARIABLE:

Mask\_T2

Model Summary

| R     | R-sq  | MSE   | F       | df1    | df2       | p     |
|-------|-------|-------|---------|--------|-----------|-------|
| .2936 | .0862 | .3879 | 12.8896 | 9.0000 | 1230.0000 | .0000 |

Model

|          | coeff  | se    | t       | p     | LLCI   | ULCI   |
|----------|--------|-------|---------|-------|--------|--------|
| constant | 4.4387 | .2411 | 18.4130 | .0000 | 3.9657 | 4.9116 |
| Reactr   | -.0208 | .0260 | -.7981  | .4249 | -.0718 | .0303  |
| TrumpT2  | -.0421 | .0061 | -6.9265 | .0000 | -.0540 | -.0302 |
| ideology | -.0181 | .0133 | -1.3649 | .1725 | -.0442 | .0079  |
| black    | -.0487 | .0458 | -1.0634 | .2878 | -.1386 | .0412  |
| hisp     | .0727  | .0441 | 1.6482  | .0996 | -.0138 | .1592  |



|        |        |       |         |       |        |        |
|--------|--------|-------|---------|-------|--------|--------|
| male   | -.1042 | .0371 | -2.8089 | .0050 | -.1770 | -.0314 |
| educ   | .0200  | .0100 | 2.0025  | .0455 | .0004  | .0397  |
| age    | .0042  | .0025 | 1.7006  | .0893 | -.0007 | .0092  |
| income | .0004  | .0004 | .9412   | .3468 | -.0004 | .0012  |

\*\*\*\*\* TOTAL EFFECT MODEL \*\*\*\*\*

OUTCOME VARIABLE:

Mask\_T2

Model Summary

|       |       |       |        |        |           |       |
|-------|-------|-------|--------|--------|-----------|-------|
| R     | R-sq  | MSE   | F      | df1    | df2       | p     |
| .2248 | .0505 | .4027 | 8.1913 | 8.0000 | 1231.0000 | .0000 |

Model

|          |        |       |         |       |        |        |
|----------|--------|-------|---------|-------|--------|--------|
|          | coeff  | se    | t       | p     | LLCI   | ULCI   |
| constant | 4.5355 | .2452 | 18.4968 | .0000 | 4.0544 | 5.0166 |
| Reactr   | -.0508 | .0261 | -1.9424 | .0523 | -.1021 | .0005  |
| ideology | -.0686 | .0113 | -6.0595 | .0000 | -.0909 | -.0464 |
| black    | .0255  | .0454 | .5619   | .5743 | -.0636 | .1146  |
| hisp     | .0820  | .0449 | 1.8263  | .0680 | -.0061 | .1702  |
| male     | -.1094 | .0378 | -2.8931 | .0039 | -.1835 | -.0352 |
| educ     | .0217  | .0102 | 2.1317  | .0332 | .0017  | .0417  |
| age      | .0049  | .0025 | 1.9189  | .0552 | -.0001 | .0099  |
| income   | .0003  | .0004 | .7447   | .4566 | -.0005 | .0012  |

\*\*\*\*\* TOTAL, DIRECT, AND INDIRECT EFFECTS OF X ON Y \*\*\*\*\*

Total effect of X on Y

|      |        |       |         |       |        |       |        |
|------|--------|-------|---------|-------|--------|-------|--------|
|      | Effect | se    | t       | p     | LLCI   | ULCI  | c_ps   |
| c_cs | -.0508 | .0261 | -1.9424 | .0523 | -.1021 | .0005 | -.0782 |
|      | -.0542 |       |         |       |        |       |        |

Direct effect of X on Y

|       |        |       |        |       |        |       |        |
|-------|--------|-------|--------|-------|--------|-------|--------|
|       | Effect | se    | t      | p     | LLCI   | ULCI  | c'_ps  |
| c'_cs | -.0208 | .0260 | -.7981 | .4249 | -.0718 | .0303 | -.0320 |
|       | -.0222 |       |        |       |        |       |        |

Indirect effect(s) of X on Y:

|         |        |        |          |          |
|---------|--------|--------|----------|----------|
|         | Effect | BootSE | BootLLCI | BootULCI |
| TrumpT2 | -.0300 | .0075  | -.0462   | -.0171   |

Partially standardized indirect effect(s) of X on Y:

|         |        |        |          |          |
|---------|--------|--------|----------|----------|
|         | Effect | BootSE | BootLLCI | BootULCI |
| TrumpT2 | -.0462 | .0106  | -.0687   | -.0273   |

Completely standardized indirect effect(s) of X on Y:

|         |        |        |          |          |
|---------|--------|--------|----------|----------|
|         | Effect | BootSE | BootLLCI | BootULCI |
| TrumpT2 | -.0320 | .0073  | -.0476   | -.0189   |

\*\*\*\*\* ANALYSIS NOTES AND ERRORS \*\*\*\*\*

Level of confidence for all confidence intervals in output:

95.0000

Number of bootstrap samples for percentile bootstrap confidence intervals:

5000

----- END MATRIX -----

\* Encoding: UTF-8.

/\* PROCESS version 3.5 \*/.  
/\* Written by Andrew F. Hayes \*/.  
/\* www.afhayes.com \*/.  
/\* www.processmacro.org \*/.  
/\* Copyright 2017-2020 by Andrew F. Hayes \*/.  
/\* Documented in <http://www.guilford.com/p/hayes3> \*/.  
/\* PROCESS workshop schedule at <http://www.processmacro.org/workshops.html>  
\*/.

/\* THIS SOFTWARE IS PROVIDED "AS IS", WITHOUT WARRANTY OF ANY KIND \*/.  
/\* EXPRESS OR IMPLIED, INCLUDING BUT NOT LIMITED TO THE WARRANTIES OF \*/.  
/\* MERCHANTABILITY, FITNESS FOR A PARTICULAR PURPOSE AND NONINFRINGEMENT \*/.  
/\* IN NO EVENT SHALL THE COPYRIGHT HOLDERS BE LIABLE FOR ANY CLAIM, \*/.  
/\* DAMAGES OR OTHER LIABILITY, WHETHER IN AN ACTION OF CONTRACT, TORT \*/.  
/\* OR OTHERWISE, ARISING FROM, OUT OF OR IN CONNECTION WITH THE \*/.  
/\* SOFTWARE OR THE USE OR OTHER DEALINGS IN THE SOFTWARE \*/.  
/\* USE OF THIS SOFTWARE IMPLIES AGREEMENT WITH THESE TERMS \*/.

set printback=off.

Run MATRIX procedure:

\*\*\*\*\* PROCESS Procedure for SPSS Version 3.5 \*\*\*\*\*

Written by Andrew F. Hayes, Ph.D. [www.afhayes.com](http://www.afhayes.com)  
Documentation available in Hayes (2018). [www.guilford.com/p/hayes3](http://www.guilford.com/p/hayes3)

\*\*\*\*\*

Model : 4  
Y : Mask\_T2  
X : CAr  
M : TrumpT2

Covariates:  
ideology black hisp male educ age income

Sample  
Size: 1243

\*\*\*\*\*

OUTCOME VARIABLE:  
TrumpT2

Model Summary

|  | R | R-sq | MSE | F | df1 | df2 | p |
|--|---|------|-----|---|-----|-----|---|
|--|---|------|-----|---|-----|-----|---|

.6249 .3905 8.7448 98.8325 8.0000 1234.0000 .0000

Model

|          | coeff   | se     | t       | p     | LLCI    | ULCI    |
|----------|---------|--------|---------|-------|---------|---------|
| constant | 1.8014  | 1.1900 | 1.5138  | .1303 | -.5333  | 4.1360  |
| CAR      | -.3854  | .1095  | -3.5213 | .0004 | -.6002  | -.1707  |
| ideology | 1.2248  | .0527  | 23.2589 | .0000 | 1.1215  | 1.3281  |
| black    | -1.8455 | .2138  | -8.6325 | .0000 | -2.2649 | -1.4261 |
| hisp     | -.2611  | .2091  | -1.2487 | .2120 | -.6713  | .1491   |
| male     | -.0747  | .1836  | -.4066  | .6844 | -.4349  | .2856   |
| educ     | -.0671  | .0476  | -1.4099 | .1588 | -.1605  | .0263   |
| age      | -.0177  | .0118  | -1.4920 | .1359 | -.0409  | .0056   |
| income   | .0019   | .0020  | .9791   | .3277 | -.0019  | .0058   |

\*\*\*\*\*

OUTCOME VARIABLE:

Mask\_T2

Model Summary

| R     | R-sq  | MSE   | F       | df1    | df2       | p     |
|-------|-------|-------|---------|--------|-----------|-------|
| .2971 | .0883 | .3861 | 13.2677 | 9.0000 | 1233.0000 | .0000 |

Model

|          | coeff  | se    | t       | p     | LLCI   | ULCI   |
|----------|--------|-------|---------|-------|--------|--------|
| constant | 4.1548 | .2503 | 16.6000 | .0000 | 3.6638 | 4.6459 |
| CAR      | .0408  | .0231 | 1.7656  | .0777 | -.0045 | .0862  |
| TrumpT2  | -.0421 | .0060 | -7.0437 | .0000 | -.0539 | -.0304 |
| ideology | -.0195 | .0133 | -1.4726 | .1411 | -.0456 | .0065  |
| black    | -.0358 | .0463 | -.7732  | .4396 | -.1265 | .0550  |
| hisp     | .0819  | .0440 | 1.8639  | .0626 | -.0043 | .1682  |
| male     | -.0814 | .0386 | -2.1099 | .0351 | -.1571 | -.0057 |
| educ     | .0225  | .0100 | 2.2494  | .0247 | .0029  | .0422  |
| age      | .0046  | .0025 | 1.8616  | .0629 | -.0002 | .0095  |
| income   | .0004  | .0004 | .9568   | .3389 | -.0004 | .0012  |

\*\*\*\*\* TOTAL EFFECT MODEL \*\*\*\*\*

OUTCOME VARIABLE:

Mask\_T2

Model Summary

| R     | R-sq  | MSE   | F      | df1    | df2       | p     |
|-------|-------|-------|--------|--------|-----------|-------|
| .2272 | .0516 | .4013 | 8.3938 | 8.0000 | 1234.0000 | .0000 |

Model

|          | coeff  | se    | t       | p     | LLCI   | ULCI   |
|----------|--------|-------|---------|-------|--------|--------|
| constant | 4.0789 | .2549 | 15.9998 | .0000 | 3.5788 | 4.5791 |
| CAR      | .0571  | .0234 | 2.4330  | .0151 | .0110  | .1031  |
| ideology | -.0711 | .0113 | -6.3068 | .0000 | -.0933 | -.0490 |
| black    | .0420  | .0458 | .9169   | .3594 | -.0479 | .1318  |
| hisp     | .0929  | .0448 | 2.0750  | .0382 | .0051  | .1808  |
| male     | -.0783 | .0393 | -1.9897 | .0468 | -.1555 | -.0011 |
| educ     | .0254  | .0102 | 2.4854  | .0131 | .0053  | .0454  |
| age      | .0054  | .0025 | 2.1210  | .0341 | .0004  | .0104  |
| income   | .0003  | .0004 | .7462   | .4557 | -.0005 | .0011  |

\*\*\*\*\* TOTAL, DIRECT, AND INDIRECT EFFECTS OF X ON Y \*\*\*\*\*

| Total effect of X on Y |        |       |        |       |       |       |       |
|------------------------|--------|-------|--------|-------|-------|-------|-------|
|                        | Effect | se    | t      | p     | LLCI  | ULCI  | c_ps  |
| c_cs                   | .0571  | .0234 | 2.4330 | .0151 | .0110 | .1031 | .0880 |
|                        | .0717  |       |        |       |       |       |       |

| Direct effect of X on Y |        |       |        |       |        |       |       |
|-------------------------|--------|-------|--------|-------|--------|-------|-------|
|                         | Effect | se    | t      | p     | LLCI   | ULCI  | c'_ps |
| c'_cs                   | .0408  | .0231 | 1.7656 | .0777 | -.0045 | .0862 | .0629 |
|                         | .0513  |       |        |       |        |       |       |

| Indirect effect(s) of X on Y: |        |        |          |          |
|-------------------------------|--------|--------|----------|----------|
|                               | Effect | BootSE | BootLLCI | BootULCI |
| TrumpT2                       | .0162  | .0056  | .0065    | .0284    |

| Partially standardized indirect effect(s) of X on Y: |        |        |          |          |
|------------------------------------------------------|--------|--------|----------|----------|
|                                                      | Effect | BootSE | BootLLCI | BootULCI |
| TrumpT2                                              | .0250  | .0083  | .0103    | .0428    |

| Completely standardized indirect effect(s) of X on Y: |        |        |          |          |
|-------------------------------------------------------|--------|--------|----------|----------|
|                                                       | Effect | BootSE | BootLLCI | BootULCI |
| TrumpT2                                               | .0204  | .0068  | .0083    | .0349    |

\*\*\*\*\* ANALYSIS NOTES AND ERRORS \*\*\*\*\*

Level of confidence for all confidence intervals in output:  
95.0000

Number of bootstrap samples for percentile bootstrap confidence intervals:  
5000

----- END MATRIX -----

\* Encoding: UTF-8.

```

/* PROCESS version 3.5 */.
/* Written by Andrew F. Hayes */.
/* www.afhayes.com */.
/* www.processmacro.org */.
/* Copyright 2017-2020 by Andrew F. Hayes */.
/* Documented in http://www.guilford.com/p/hayes3 */.
/* PROCESS workshop schedule at http://www.processmacro.org/workshops.html
*/.

```

```

/* THIS SOFTWARE IS PROVIDED "AS IS", WITHOUT WARRANTY OF ANY KIND */.
/* EXPRESS OR IMPLIED, INCLUDING BUT NOT LIMITED TO THE WARRANTIES OF */.
/* MERCHANTABILITY, FITNESS FOR A PARTICULAR PURPOSE AND NONINFRINGEMENT */.
/* IN NO EVENT SHALL THE COPYRIGHT HOLDERS BE LIABLE FOR ANY CLAIM, */.
/* DAMAGES OR OTHER LIABILITY, WHETHER IN AN ACTION OF CONTRACT, TORT */.
/* OR OTHERWISE, ARISING FROM, OUT OF OR IN CONNECTION WITH THE */.
/* SOFTWARE OR THE USE OR OTHER DEALINGS IN THE SOFTWARE */.
/* USE OF THIS SOFTWARE IMPLIES AGREEMENT WITH THESE TERMS */.

```

set printback=off.

Run MATRIX procedure:

\*\*\*\*\* PROCESS Procedure for SPSS Version 3.5 \*\*\*\*\*

Written by Andrew F. Hayes, Ph.D. www.afhayes.com  
Documentation available in Hayes (2018). www.guilford.com/p/hayes3

\*\*\*\*\*

Model : 4  
Y : Mask\_T2  
X : CAr  
M : BidenT2

Covariates:

ideology black hisp male educ age income

Sample

Size: 1241

\*\*\*\*\*

OUTCOME VARIABLE:

BidenT2

Model Summary

| R     | R-sq  | MSE    | F        | df1    | df2       | p     |
|-------|-------|--------|----------|--------|-----------|-------|
| .6646 | .4416 | 8.3273 | 121.8095 | 8.0000 | 1232.0000 | .0000 |

Model

|          | coeff   | se     | t        | p     | LLCI    | ULCI    |
|----------|---------|--------|----------|-------|---------|---------|
| constant | 7.8786  | 1.1625 | 6.7770   | .0000 | 5.5978  | 10.1594 |
| CAr      | .3535   | .1070  | 3.3048   | .0010 | .1436   | .5633   |
| ideology | -1.3227 | .0515  | -25.7049 | .0000 | -1.4236 | -1.2217 |
| black    | 1.9836  | .2083  | 9.5206   | .0000 | 1.5748  | 2.3923  |
| hisp     | .4097   | .2047  | 2.0018   | .0455 | .0082   | .8112   |
| male     | -.2754  | .1796  | -1.5331  | .1255 | -.6278  | .0770   |
| educ     | -.0108  | .0464  | -.2321   | .8165 | -.1018  | .0803   |
| age      | .0310   | .0116  | 2.6711   | .0077 | .0082   | .0537   |
| income   | .0003   | .0019  | .1732    | .8625 | -.0035  | .0041   |

\*\*\*\*\*

OUTCOME VARIABLE:

Mask\_T2

Model Summary

| R     | R-sq  | MSE   | F       | df1    | df2       | p     |
|-------|-------|-------|---------|--------|-----------|-------|
| .2987 | .0892 | .3908 | 13.3950 | 9.0000 | 1231.0000 | .0000 |

Model

|          | coeff  | se    | t       | p     | LLCI   | ULCI   |
|----------|--------|-------|---------|-------|--------|--------|
| constant | 3.7348 | .2565 | 14.5599 | .0000 | 3.2315 | 4.2380 |
| CAr      | .0440  | .0233 | 1.8896  | .0590 | -.0017 | .0896  |
| BidenT2  | .0440  | .0062 | 7.1270  | .0000 | .0319  | .0561  |
| ideology | -.0129 | .0138 | -.9351  | .3499 | -.0400 | .0142  |

|        |        |       |         |       |        |       |
|--------|--------|-------|---------|-------|--------|-------|
| black  | -.0408 | .0468 | -.8734  | .3826 | -.1326 | .0509 |
| hisp   | .0692  | .0444 | 1.5590  | .1193 | -.0179 | .1564 |
| male   | -.0674 | .0389 | -1.7314 | .0836 | -.1439 | .0090 |
| educ   | .0271  | .0101 | 2.6962  | .0071 | .0074  | .0468 |
| age    | .0035  | .0025 | 1.3774  | .1686 | -.0015 | .0084 |
| income | .0003  | .0004 | .7863   | .4318 | -.0005 | .0012 |

\*\*\*\*\* TOTAL EFFECT MODEL \*\*\*\*\*

OUTCOME VARIABLE:

Mask\_T2

Model Summary

|       |       |       |        |        |           |       |
|-------|-------|-------|--------|--------|-----------|-------|
| R     | R-sq  | MSE   | F      | df1    | df2       | p     |
| .2272 | .0516 | .4066 | 8.3814 | 8.0000 | 1232.0000 | .0000 |

Model

|          |        |       |         |       |        |        |
|----------|--------|-------|---------|-------|--------|--------|
|          | coeff  | se    | t       | p     | LLCI   | ULCI   |
| constant | 4.0814 | .2569 | 15.8870 | .0000 | 3.5773 | 4.5854 |
| CAr      | .0595  | .0236 | 2.5186  | .0119 | .0132  | .1059  |
| ideology | -.0711 | .0114 | -6.2533 | .0000 | -.0934 | -.0488 |
| black    | .0464  | .0460 | 1.0081  | .3136 | -.0439 | .1367  |
| hisp     | .0873  | .0452 | 1.9294  | .0539 | -.0015 | .1760  |
| male     | -.0795 | .0397 | -2.0042 | .0453 | -.1574 | -.0017 |
| educ     | .0266  | .0103 | 2.5972  | .0095 | .0065  | .0467  |
| age      | .0048  | .0026 | 1.8860  | .0595 | -.0002 | .0099  |
| income   | .0003  | .0004 | .8054   | .4208 | -.0005 | .0012  |

\*\*\*\*\* TOTAL, DIRECT, AND INDIRECT EFFECTS OF X ON Y \*\*\*\*\*

Total effect of X on Y

|        |       |       |        |       |       |       |       |
|--------|-------|-------|--------|-------|-------|-------|-------|
| Effect | se    | t     | p      | LLCI  | ULCI  | c_ps  |       |
| c_cs   | .0595 | .0236 | 2.5186 | .0119 | .0132 | .1059 | .0912 |
|        | .0743 |       |        |       |       |       |       |

Direct effect of X on Y

|        |       |       |        |       |        |       |       |
|--------|-------|-------|--------|-------|--------|-------|-------|
| Effect | se    | t     | p      | LLCI  | ULCI   | c'_ps |       |
| c'_cs  | .0440 | .0233 | 1.8896 | .0590 | -.0017 | .0896 | .0674 |
|        | .0549 |       |        |       |        |       |       |

Indirect effect(s) of X on Y:

|         |        |          |          |       |
|---------|--------|----------|----------|-------|
| Effect  | BootSE | BootLLCI | BootULCI |       |
| BidenT2 | .0156  | .0053    | .0059    | .0269 |

Partially standardized indirect effect(s) of X on Y:

|         |        |          |          |       |
|---------|--------|----------|----------|-------|
| Effect  | BootSE | BootLLCI | BootULCI |       |
| BidenT2 | .0238  | .0078    | .0094    | .0404 |

Completely standardized indirect effect(s) of X on Y:

|         |        |          |          |       |
|---------|--------|----------|----------|-------|
| Effect  | BootSE | BootLLCI | BootULCI |       |
| BidenT2 | .0194  | .0064    | .0077    | .0327 |

\*\*\*\*\* ANALYSIS NOTES AND ERRORS \*\*\*\*\*

Level of confidence for all confidence intervals in output:

95.0000

Number of bootstrap samples for percentile bootstrap confidence intervals:  
5000

----- END MATRIX -----

\* Encoding: UTF-8.

```
/* PROCESS version 3.5 */.  
/* Written by Andrew F. Hayes */.  
/* www.afhayes.com */.  
/* www.processmacro.org */.  
/* Copyright 2017-2020 by Andrew F. Hayes */.  
/* Documented in http://www.guilford.com/p/hayes3 */.  
/* PROCESS workshop schedule at http://www.processmacro.org/workshops.html  
*/.
```

```
/* THIS SOFTWARE IS PROVIDED "AS IS", WITHOUT WARRANTY OF ANY KIND */.  
/* EXPRESS OR IMPLIED, INCLUDING BUT NOT LIMITED TO THE WARRANTIES OF */.  
/* MERCHANTABILITY, FITNESS FOR A PARTICULAR PURPOSE AND NONINFRINGEMENT */.  
/* IN NO EVENT SHALL THE COPYRIGHT HOLDERS BE LIABLE FOR ANY CLAIM, */.  
/* DAMAGES OR OTHER LIABILITY, WHETHER IN AN ACTION OF CONTRACT, TORT */.  
/* OR OTHERWISE, ARISING FROM, OUT OF OR IN CONNECTION WITH THE */.  
/* SOFTWARE OR THE USE OR OTHER DEALINGS IN THE SOFTWARE */.  
/* USE OF THIS SOFTWARE IMPLIES AGREEMENT WITH THESE TERMS */.
```

set printback=off.

Run MATRIX procedure:

\*\*\*\*\* PROCESS Procedure for SPSS Version 3.5 \*\*\*\*\*

Written by Andrew F. Hayes, Ph.D.            www.afhayes.com  
Documentation available in Hayes (2018). www.guilford.com/p/hayes3

\*\*\*\*\*

```
Model   : 4  
Y       : Mask_T2  
X       : Reactr  
M       : BidenT2
```

Covariates:

ideology black    hisp        male        educ        age        income

Sample

Size: 1238

\*\*\*\*\*

OUTCOME VARIABLE:

BidenT2

Model Summary

| R     | R-sq  | MSE    | F        | df1    | df2       | p     |
|-------|-------|--------|----------|--------|-----------|-------|
| .6785 | .4603 | 8.0554 | 131.0440 | 8.0000 | 1229.0000 | .0000 |

Model

|          | coeff   | se     | t        | p     | LLCI    | ULCI    |
|----------|---------|--------|----------|-------|---------|---------|
| constant | 11.8653 | 1.0983 | 10.8033  | .0000 | 9.7106  | 14.0201 |
| Reactr   | -.7249  | .1164  | -6.2266  | .0000 | -.9533  | -.4965  |
| ideology | -1.3031 | .0507  | -25.7020 | .0000 | -1.4026 | -1.2037 |
| black    | 1.9195  | .2028  | 9.4652   | .0000 | 1.5217  | 2.3174  |
| hisp     | .3774   | .2016  | 1.8722   | .0614 | -.0181  | .7728   |
| male     | -.4550  | .1695  | -2.6848  | .0074 | -.7875  | -.1225  |
| educ     | -.0383  | .0455  | -.8419   | .4000 | -.1276  | .0510   |
| age      | .0291   | .0114  | 2.5503   | .0109 | .0067   | .0515   |
| income   | .0005   | .0019  | .2493    | .8032 | -.0033  | .0042   |

\*\*\*\*\*

OUTCOME VARIABLE:

Mask\_T2

Model Summary

| R     | R-sq  | MSE   | F       | df1    | df2       | p     |
|-------|-------|-------|---------|--------|-----------|-------|
| .2947 | .0868 | .3927 | 12.9740 | 9.0000 | 1228.0000 | .0000 |

Model

|          | coeff  | se    | t       | p     | LLCI   | ULCI   |
|----------|--------|-------|---------|-------|--------|--------|
| constant | 4.0376 | .2538 | 15.9118 | .0000 | 3.5398 | 4.5354 |
| Reactr   | -.0223 | .0261 | -.8535  | .3936 | -.0735 | .0289  |
| BidenT2  | .0439  | .0063 | 6.9765  | .0000 | .0316  | .0563  |
| ideology | -.0114 | .0139 | -.8197  | .4126 | -.0386 | .0159  |
| black    | -.0547 | .0464 | -1.1801 | .2382 | -.1457 | .0363  |
| hisp     | .0604  | .0446 | 1.3547  | .1758 | -.0271 | .1478  |
| male     | -.0915 | .0375 | -2.4389 | .0149 | -.1652 | -.0179 |
| educ     | .0245  | .0101 | 2.4411  | .0148 | .0048  | .0443  |
| age      | .0031  | .0025 | 1.2152  | .2245 | -.0019 | .0080  |
| income   | .0003  | .0004 | .7589   | .4480 | -.0005 | .0011  |

\*\*\*\*\* TOTAL EFFECT MODEL \*\*\*\*\*

OUTCOME VARIABLE:

Mask\_T2

Model Summary

| R     | R-sq  | MSE   | F      | df1    | df2       | p     |
|-------|-------|-------|--------|--------|-----------|-------|
| .2250 | .0506 | .4079 | 8.1939 | 8.0000 | 1229.0000 | .0000 |

Model

|          | coeff  | se    | t       | p     | LLCI   | ULCI   |
|----------|--------|-------|---------|-------|--------|--------|
| constant | 4.5590 | .2472 | 18.4457 | .0000 | 4.0741 | 5.0439 |
| Reactr   | -.0541 | .0262 | -2.0663 | .0390 | -.1055 | -.0027 |
| ideology | -.0686 | .0114 | -6.0156 | .0000 | -.0910 | -.0463 |
| black    | .0296  | .0456 | .6488   | .5166 | -.0599 | .1191  |
| hisp     | .0770  | .0454 | 1.6966  | .0900 | -.0120 | .1659  |
| male     | -.1115 | .0381 | -2.9242 | .0035 | -.1863 | -.0367 |
| educ     | .0229  | .0102 | 2.2314  | .0258 | .0028  | .0430  |
| age      | .0044  | .0026 | 1.6934  | .0906 | -.0007 | .0094  |
| income   | .0003  | .0004 | .7933   | .4277 | -.0005 | .0012  |

\*\*\*\*\* TOTAL, DIRECT, AND INDIRECT EFFECTS OF X ON Y \*\*\*\*\*



| Total effect of X on Y |        |       |         |       |        |        |        |
|------------------------|--------|-------|---------|-------|--------|--------|--------|
|                        | Effect | se    | t       | p     | LLCI   | ULCI   | c_ps   |
| c_cs                   | -.0541 | .0262 | -2.0663 | .0390 | -.1055 | -.0027 | -.0829 |
|                        | -.0577 |       |         |       |        |        |        |

| Direct effect of X on Y |        |       |        |       |        |       |        |
|-------------------------|--------|-------|--------|-------|--------|-------|--------|
|                         | Effect | se    | t      | p     | LLCI   | ULCI  | c'_ps  |
| c'_cs                   | -.0223 | .0261 | -.8535 | .3936 | -.0735 | .0289 | -.0341 |
|                         | -.0237 |       |        |       |        |       |        |

| Indirect effect(s) of X on Y: |        |        |          |          |
|-------------------------------|--------|--------|----------|----------|
|                               | Effect | BootSE | BootLLCI | BootULCI |
| BidentT2                      | -.0319 | .0073  | -.0477   | -.0189   |

| Partially standardized indirect effect(s) of X on Y: |        |        |          |          |
|------------------------------------------------------|--------|--------|----------|----------|
|                                                      | Effect | BootSE | BootLLCI | BootULCI |
| BidentT2                                             | -.0488 | .0104  | -.0708   | -.0299   |

| Completely standardized indirect effect(s) of X on Y: |        |        |          |          |
|-------------------------------------------------------|--------|--------|----------|----------|
|                                                       | Effect | BootSE | BootLLCI | BootULCI |
| BidentT2                                              | -.0339 | .0072  | -.0493   | -.0207   |

\*\*\*\*\* ANALYSIS NOTES AND ERRORS \*\*\*\*\*

Level of confidence for all confidence intervals in output:  
95.0000

Number of bootstrap samples for percentile bootstrap confidence intervals:  
5000

----- END MATRIX -----

\*\*\*MODERATION ANALYSES

```
USE ALL.
COMPUTE filter_$=((OVER50 = 0) AND (xconfirm = 1)).
VARIABLE LABELS filter_$ '(OVER50 = 0) AND (xconfirm = 1) (FILTER)'.
VALUE LABELS filter_$ 0 'Not Selected' 1 'Selected'.
FORMATS filter_$ (f1.0).
FILTER BY filter_$.
EXECUTE.
```

\*Assigning weights to under 50 age group

```
DATASET ACTIVATE DataSet1.
WEIGHT BY xadj_under50_weight.
* Encoding: UTF-8.
```

```
/* PROCESS version 3.5 */.
/* Written by Andrew F. Hayes */.
/* www.afhayes.com */.
/* www.processmacro.org */.
/* Copyright 2017-2020 by Andrew F. Hayes */.
/* Documented in http://www.guilford.com/p/hayes3 */.
/* PROCESS workshop schedule at http://www.processmacro.org/workshops.html
*/.
```

```
/* THIS SOFTWARE IS PROVIDED "AS IS", WITHOUT WARRANTY OF ANY KIND */.
/* EXPRESS OR IMPLIED, INCLUDING BUT NOT LIMITED TO THE WARRANTIES OF */.
/* MERCHANTABILITY, FITNESS FOR A PARTICULAR PURPOSE AND NONINFRINGEMENT */.
/* IN NO EVENT SHALL THE COPYRIGHT HOLDERS BE LIABLE FOR ANY CLAIM, */.
/* DAMAGES OR OTHER LIABILITY, WHETHER IN AN ACTION OF CONTRACT, TORT */.
/* OR OTHERWISE, ARISING FROM, OUT OF OR IN CONNECTION WITH THE */.
/* SOFTWARE OR THE USE OR OTHER DEALINGS IN THE SOFTWARE */.
/* USE OF THIS SOFTWARE IMPLIES AGREEMENT WITH THESE TERMS */.
```

```
set printback=off.
```

Run MATRIX procedure:

```
***** PROCESS Procedure for SPSS Version 3.5 *****
```

```
Written by Andrew F. Hayes, Ph.D. www.afhayes.com
Documentation available in Hayes (2018). www.guilford.com/p/hayes3
```

```
*****
```

```
Model : 1
Y : Mask_T2
X : CAr
W : TrumpT2
```

Covariates:

```
ideology black hisp male educ age income
```

Sample  
Size: 462

\*\*\*\*\*

OUTCOME VARIABLE:

Mask\_T2

Model Summary

| R     | R-sq  | MSE   | F      | df1     | df2      | p     |
|-------|-------|-------|--------|---------|----------|-------|
| .3132 | .0981 | .6620 | 4.9052 | 10.0000 | 451.0000 | .0000 |

Model

|          | coeff  | se    | t       | p     | LLCI   | ULCI   |
|----------|--------|-------|---------|-------|--------|--------|
| constant | 3.9409 | .4281 | 9.2051  | .0000 | 3.0995 | 4.7823 |
| CAR      | .0776  | .0615 | 1.2614  | .2078 | -.0433 | .1984  |
| TrumpT2  | -.1178 | .0474 | -2.4841 | .0133 | -.2110 | -.0246 |
| Int_1    | .0184  | .0140 | 1.3147  | .1893 | -.0091 | .0458  |
| ideology | .0145  | .0258 | .5627   | .5739 | -.0361 | .0651  |
| black    | -.0143 | .0907 | -.1578  | .8747 | -.1926 | .1640  |
| hisp     | -.0279 | .0918 | -.3035  | .7617 | -.2082 | .1525  |
| male     | -.1040 | .0858 | -1.2128 | .2259 | -.2725 | .0645  |
| educ     | .0100  | .0218 | .4609   | .6451 | -.0328 | .0528  |
| age      | .0054  | .0056 | .9628   | .3362 | -.0056 | .0164  |
| income   | .0015  | .0010 | 1.5019  | .1338 | -.0004 | .0034  |

Product terms key:

Int\_1 : CAR x TrumpT2

Test(s) of highest order unconditional interaction(s):

|     | R2-chng | F      | df1    | df2      | p     |
|-----|---------|--------|--------|----------|-------|
| X*W | .0035   | 1.7286 | 1.0000 | 451.0000 | .1893 |

-----

Focal predict: CAR (X)  
Mod var: TrumpT2 (W)

Data for visualizing the conditional effect of the focal predictor:  
Paste text below into a SPSS syntax window and execute to produce plot.

DATA LIST FREE/

CAR TrumpT2 Mask\_T2 .

BEGIN DATA.

|        |        |        |
|--------|--------|--------|
| 2.7500 | .0000  | 4.6308 |
| 3.5000 | .0000  | 4.6890 |
| 4.2500 | .0000  | 4.7472 |
| 2.7500 | .0000  | 4.6308 |
| 3.5000 | .0000  | 4.6890 |
| 4.2500 | .0000  | 4.7472 |
| 2.7500 | 7.0000 | 4.1593 |
| 3.5000 | 7.0000 | 4.3138 |
| 4.2500 | 7.0000 | 4.4684 |

END DATA.

GRAPH/SCATTERPLOT=

CAR WITH Mask\_T2 BY TrumpT2 .

\*\*\*\*\* ANALYSIS NOTES AND ERRORS \*\*\*\*\*

Level of confidence for all confidence intervals in output:

95.0000

----- END MATRIX -----

\* Encoding: UTF-8.

/\* PROCESS version 3.5 \*/.  
/\* Written by Andrew F. Hayes \*/.  
/\* www.afhayes.com \*/.  
/\* www.processmacro.org \*/.  
/\* Copyright 2017-2020 by Andrew F. Hayes \*/.  
/\* Documented in <http://www.guilford.com/p/hayes3> \*/.  
/\* PROCESS workshop schedule at <http://www.processmacro.org/workshops.html>  
\*/.

/\* THIS SOFTWARE IS PROVIDED "AS IS", WITHOUT WARRANTY OF ANY KIND \*/.  
/\* EXPRESS OR IMPLIED, INCLUDING BUT NOT LIMITED TO THE WARRANTIES OF \*/.  
/\* MERCHANTABILITY, FITNESS FOR A PARTICULAR PURPOSE AND NONINFRINGEMENT \*/.  
/\* IN NO EVENT SHALL THE COPYRIGHT HOLDERS BE LIABLE FOR ANY CLAIM, \*/.  
/\* DAMAGES OR OTHER LIABILITY, WHETHER IN AN ACTION OF CONTRACT, TORT \*/.  
/\* OR OTHERWISE, ARISING FROM, OUT OF OR IN CONNECTION WITH THE \*/.  
/\* SOFTWARE OR THE USE OR OTHER DEALINGS IN THE SOFTWARE \*/.  
/\* USE OF THIS SOFTWARE IMPLIES AGREEMENT WITH THESE TERMS \*/.

set printback=off.

Run MATRIX procedure:

\*\*\*\*\* PROCESS Procedure for SPSS Version 3.5 \*\*\*\*\*

Written by Andrew F. Hayes, Ph.D.                      www.afhayes.com  
Documentation available in Hayes (2018). [www.guilford.com/p/hayes3](http://www.guilford.com/p/hayes3)

\*\*\*\*\*

Model : 1  
Y : Mask\_T2  
X : Reactr  
W : TrumpT2

Covariates:  
ideology black      hisp              male              educ              age              income

Sample  
Size: 463

\*\*\*\*\*

OUTCOME VARIABLE:  
Mask\_T2

| Model Summary |       |       |       |        |         |          |       |
|---------------|-------|-------|-------|--------|---------|----------|-------|
|               | R     | R-sq  | MSE   | F      | df1     | df2      | p     |
|               | .3029 | .0917 | .6673 | 4.5658 | 10.0000 | 452.0000 | .0000 |

| Model    | coeff  | se    | t       | p     | LLCI   | ULCI   |
|----------|--------|-------|---------|-------|--------|--------|
| constant | 4.3460 | .4154 | 10.4619 | .0000 | 3.5296 | 5.1624 |
| Reactr   | -.0375 | .0635 | -.5911  | .5548 | -.1623 | .0872  |
| TrumpT2  | -.1433 | .0450 | -3.1832 | .0016 | -.2317 | -.0548 |
| Int_1    | .0246  | .0135 | 1.8280  | .0682 | -.0018 | .0511  |
| ideology | .0262  | .0256 | 1.0251  | .3059 | -.0240 | .0765  |
| black    | .0069  | .0913 | .0762   | .9393 | -.1724 | .1863  |
| hisp     | -.0431 | .0920 | -.4683  | .6398 | -.2240 | .1378  |
| male     | -.1908 | .0832 | -2.2925 | .0223 | -.3544 | -.0272 |
| educ     | .0093  | .0218 | .4287   | .6683 | -.0335 | .0522  |
| age      | .0058  | .0056 | 1.0292  | .3039 | -.0053 | .0168  |
| income   | .0012  | .0010 | 1.1880  | .2354 | -.0008 | .0031  |

Product terms key:

Int\_1 : Reactr x TrumpT2

Test(s) of highest order unconditional interaction(s):

|     | R2-chng | F      | df1    | df2      | p     |
|-----|---------|--------|--------|----------|-------|
| X*W | .0067   | 3.3417 | 1.0000 | 452.0000 | .0682 |

-----

Focal predict: Reactr (X)

Mod var: TrumpT2 (W)

Conditional effects of the focal predictor at values of the moderator(s):

| TrumpT2 | Effect | se    | t      | p     | LLCI   | ULCI  |
|---------|--------|-------|--------|-------|--------|-------|
| .0000   | -.0375 | .0635 | -.5911 | .5548 | -.1623 | .0872 |
| .0000   | -.0375 | .0635 | -.5911 | .5548 | -.1623 | .0872 |
| 7.0000  | .1350  | .0728 | 1.8550 | .0642 | -.0080 | .2780 |

Data for visualizing the conditional effect of the focal predictor:

Paste text below into a SPSS syntax window and execute to produce plot.

DATA LIST FREE/

Reactr TrumpT2 Mask\_T2 .

BEGIN DATA.

```

2.5000 .0000 4.7228
3.0000 .0000 4.7040
4.0000 .0000 4.6665
2.5000 .0000 4.7228
3.0000 .0000 4.7040
4.0000 .0000 4.6665
2.5000 7.0000 4.1512
3.0000 7.0000 4.2186
4.0000 7.0000 4.3536

```

END DATA.

GRAPH/SCATTERPLOT=

Reactr WITH Mask\_T2 BY TrumpT2 .

\*\*\*\*\* ANALYSIS NOTES AND ERRORS \*\*\*\*\*

Level of confidence for all confidence intervals in output:

95.0000

W values in conditional tables are the 16th, 50th, and 84th percentiles.

----- END MATRIX -----

\* Encoding: UTF-8.

/\* PROCESS version 3.5 \*/.  
/\* Written by Andrew F. Hayes \*/.  
/\* www.afhayes.com \*/.  
/\* www.processmacro.org \*/.  
/\* Copyright 2017-2020 by Andrew F. Hayes \*/.  
/\* Documented in <http://www.guilford.com/p/hayes3> \*/.  
/\* PROCESS workshop schedule at <http://www.processmacro.org/workshops.html>  
\*/.

/\* THIS SOFTWARE IS PROVIDED "AS IS", WITHOUT WARRANTY OF ANY KIND \*/.  
/\* EXPRESS OR IMPLIED, INCLUDING BUT NOT LIMITED TO THE WARRANTIES OF \*/.  
/\* MERCHANTABILITY, FITNESS FOR A PARTICULAR PURPOSE AND NONINFRINGEMENT \*/.  
/\* IN NO EVENT SHALL THE COPYRIGHT HOLDERS BE LIABLE FOR ANY CLAIM, \*/.  
/\* DAMAGES OR OTHER LIABILITY, WHETHER IN AN ACTION OF CONTRACT, TORT \*/.  
/\* OR OTHERWISE, ARISING FROM, OUT OF OR IN CONNECTION WITH THE \*/.  
/\* SOFTWARE OR THE USE OR OTHER DEALINGS IN THE SOFTWARE \*/.  
/\* USE OF THIS SOFTWARE IMPLIES AGREEMENT WITH THESE TERMS \*/.

set printback=off.

Run MATRIX procedure:

\*\*\*\*\* PROCESS Procedure for SPSS Version 3.5 \*\*\*\*\*

Written by Andrew F. Hayes, Ph.D.           www.afhayes.com  
Documentation available in Hayes (2018). [www.guilford.com/p/hayes3](http://www.guilford.com/p/hayes3)

\*\*\*\*\*

Model : 1  
Y : Mask\_T2  
X : Reactr  
W : BidenT2

Covariates:

ideology black    hisp        male        educ        age        income

Sample

Size: 464

\*\*\*\*\*

OUTCOME VARIABLE:

Mask\_T2

Model Summary

| R     | R-sq  | MSE   | F      | df1     | df2      | p     |
|-------|-------|-------|--------|---------|----------|-------|
| .3119 | .0973 | .6701 | 4.8803 | 10.0000 | 453.0000 | .0000 |

Model

| coeff | se | t | p | LLCI | ULCI |
|-------|----|---|---|------|------|
|-------|----|---|---|------|------|

|          |        |       |         |       |        |        |
|----------|--------|-------|---------|-------|--------|--------|
| constant | 3.4791 | .4731 | 7.3542  | .0000 | 2.5494 | 4.4087 |
| Reactr   | .0047  | .0983 | .0481   | .9617 | -.1884 | .1978  |
| BidentT2 | .0811  | .0452 | 1.7956  | .0732 | -.0077 | .1699  |
| Int_1    | -.0022 | .0137 | -.1630  | .8706 | -.0291 | .0246  |
| ideology | .0464  | .0266 | 1.7431  | .0820 | -.0059 | .0988  |
| black    | -.0148 | .0904 | -.1633  | .8703 | -.1924 | .1629  |
| hisp     | -.0086 | .0922 | -.0929  | .9260 | -.1898 | .1727  |
| male     | -.2195 | .0815 | -2.6933 | .0073 | -.3797 | -.0593 |
| educ     | .0149  | .0217 | .6841   | .4943 | -.0279 | .0576  |
| age      | .0064  | .0056 | 1.1571  | .2478 | -.0045 | .0174  |
| income   | .0006  | .0010 | .6301   | .5289 | -.0013 | .0025  |

Product terms key:

Int\_1 : Reactr x BidentT2

Test(s) of highest order unconditional interaction(s):

|     | R2-chng | F     | df1    | df2      | p     |
|-----|---------|-------|--------|----------|-------|
| X*W | .0001   | .0266 | 1.0000 | 453.0000 | .8706 |

-----

Focal predict: Reactr (X)  
Mod var: BidentT2 (W)

Data for visualizing the conditional effect of the focal predictor:  
Paste text below into a SPSS syntax window and execute to produce plot.

DATA LIST FREE/

```

  Reactr   BidentT2   Mask_T2   .
BEGIN DATA.
  2.5000   1.0000     4.1685
  3.0000   1.0000     4.1697
  3.9000   1.0000     4.1720
  2.5000   6.0000     4.5463
  3.0000   6.0000     4.5420
  3.9000   6.0000     4.5342
  2.5000  10.0000     4.8486
  3.0000  10.0000     4.8398
  3.9000  10.0000     4.8241

```

END DATA.

GRAPH/SCATTERPLOT=

Reactr WITH Mask\_T2 BY BidentT2 .

\*\*\*\*\* ANALYSIS NOTES AND ERRORS \*\*\*\*\*

Level of confidence for all confidence intervals in output:  
95.0000

----- END MATRIX -----

\* Encoding: UTF-8.

```

/* PROCESS version 3.5 */.
/* Written by Andrew F. Hayes */.
/* www.afhayes.com */.
/* www.processmacro.org */.
/* Copyright 2017-2020 by Andrew F. Hayes */.

```

```

/* Documented in http://www.guilford.com/p/hayes3 */.
/* PROCESS workshop schedule at http://www.processmacro.org/workshops.html
*/.

```

```

/* THIS SOFTWARE IS PROVIDED "AS IS", WITHOUT WARRANTY OF ANY KIND */.
/* EXPRESS OR IMPLIED, INCLUDING BUT NOT LIMITED TO THE WARRANTIES OF */.
/* MERCHANTABILITY, FITNESS FOR A PARTICULAR PURPOSE AND NONINFRINGEMENT */.
/* IN NO EVENT SHALL THE COPYRIGHT HOLDERS BE LIABLE FOR ANY CLAIM, */.
/* DAMAGES OR OTHER LIABILITY, WHETHER IN AN ACTION OF CONTRACT, TORT */.
/* OR OTHERWISE, ARISING FROM, OUT OF OR IN CONNECTION WITH THE */.
/* SOFTWARE OR THE USE OR OTHER DEALINGS IN THE SOFTWARE */.
/* USE OF THIS SOFTWARE IMPLIES AGREEMENT WITH THESE TERMS */.

```

```
set printback=off.
```

```
Run MATRIX procedure:
```

```
***** PROCESS Procedure for SPSS Version 3.5 *****
```

```

                Written by Andrew F. Hayes, Ph.D.          www.afhayes.com
Documentation available in Hayes (2018). www.guilford.com/p/hayes3

```

```
*****
```

```

Model   : 1
  Y     : Mask_T2
  X     : CAr
  W     : BidenT2

```

```
Covariates:
```

```
ideology black    hisp      male      educ      age      income
```

```
Sample
```

```
Size: 463
```

```
*****
```

```
OUTCOME VARIABLE:
```

```
Mask_T2
```

```
Model Summary
```

|  | R     | R-sq  | MSE   | F      | df1     | df2      | p     |
|--|-------|-------|-------|--------|---------|----------|-------|
|  | .3587 | .1287 | .6462 | 6.6741 | 10.0000 | 452.0000 | .0000 |

```
Model
```

|          | coeff  | se    | t       | p     | LLCI   | ULCI   |
|----------|--------|-------|---------|-------|--------|--------|
| constant | 2.2705 | .4877 | 4.6557  | .0000 | 1.3121 | 3.2289 |
| CAr      | .3594  | .0916 | 3.9253  | .0001 | .1795  | .5393  |
| BidenT2  | .1947  | .0475 | 4.0953  | .0000 | .1013  | .2881  |
| Int_1    | -.0366 | .0136 | -2.6880 | .0075 | -.0633 | -.0098 |
| ideology | .0384  | .0264 | 1.4544  | .1465 | -.0135 | .0902  |
| black    | .0072  | .0890 | .0808   | .9356 | -.1677 | .1821  |
| hisp     | .0339  | .0908 | .3738   | .7087 | -.1445 | .2124  |
| male     | -.1267 | .0844 | -1.5019 | .1338 | -.2926 | .0391  |
| educ     | .0114  | .0214 | .5354   | .5926 | -.0306 | .0534  |
| age      | .0076  | .0055 | 1.3701  | .1713 | -.0033 | .0184  |
| income   | .0007  | .0010 | .7239   | .4695 | -.0012 | .0026  |



Product terms key:

Int\_1 : Car x Bident2

Test(s) of highest order unconditional interaction(s):

|     | R2-chng | F      | df1    | df2      | p     |
|-----|---------|--------|--------|----------|-------|
| X*W | .0139   | 7.2252 | 1.0000 | 452.0000 | .0075 |

-----

Focal predict: Car (X)  
Mod var: Bident2 (W)

Conditional effects of the focal predictor at values of the moderator(s):

| Bident2 | Effect | se    | t      | p     | LLCI   | ULCI  |
|---------|--------|-------|--------|-------|--------|-------|
| 1.0000  | .3228  | .0805 | 4.0093 | .0001 | .1646  | .4811 |
| 6.0000  | .1399  | .0504 | 2.7768 | .0057 | .0409  | .2390 |
| 10.0000 | -.0064 | .0778 | -.0821 | .9346 | -.1593 | .1465 |

Data for visualizing the conditional effect of the focal predictor:  
Paste text below into a SPSS syntax window and execute to produce plot.

DATA LIST FREE/

```
Car      Bident2  Mask_T2  .
BEGIN DATA.
  2.7500  1.0000  3.9762
  3.5000  1.0000  4.2184
  4.2500  1.0000  4.4605
  2.7500  6.0000  4.4468
  3.5000  6.0000  4.5517
  4.2500  6.0000  4.6566
  2.7500 10.0000  4.8232
  3.5000 10.0000  4.8184
  4.2500 10.0000  4.8136
```

END DATA.

GRAPH/SCATTERPLOT=

```
Car      WITH      Mask_T2  BY      Bident2  .
```

\*\*\*\*\* ANALYSIS NOTES AND ERRORS \*\*\*\*\*

Level of confidence for all confidence intervals in output:  
95.0000

W values in conditional tables are the 16th, 50th, and 84th percentiles.

----- END MATRIX -----

DATASET ACTIVATE DataSet1.

DATA LIST FREE/

```
Car      Bident2  Mask_T2  .
BEGIN DATA.
  2.7500  1.0000  3.9762
  3.5000  1.0000  4.2184
  4.2500  1.0000  4.4605
  2.7500  6.0000  4.4468
  3.5000  6.0000  4.5517
```

```

4.2500    6.0000    4.6566
2.7500   10.0000    4.8232
3.5000   10.0000    4.8184
4.2500   10.0000    4.8136

```

END DATA.

GRAPH/SCATTERPLOT=

CAr WITH Mask\_T2 BY BidenT2 .

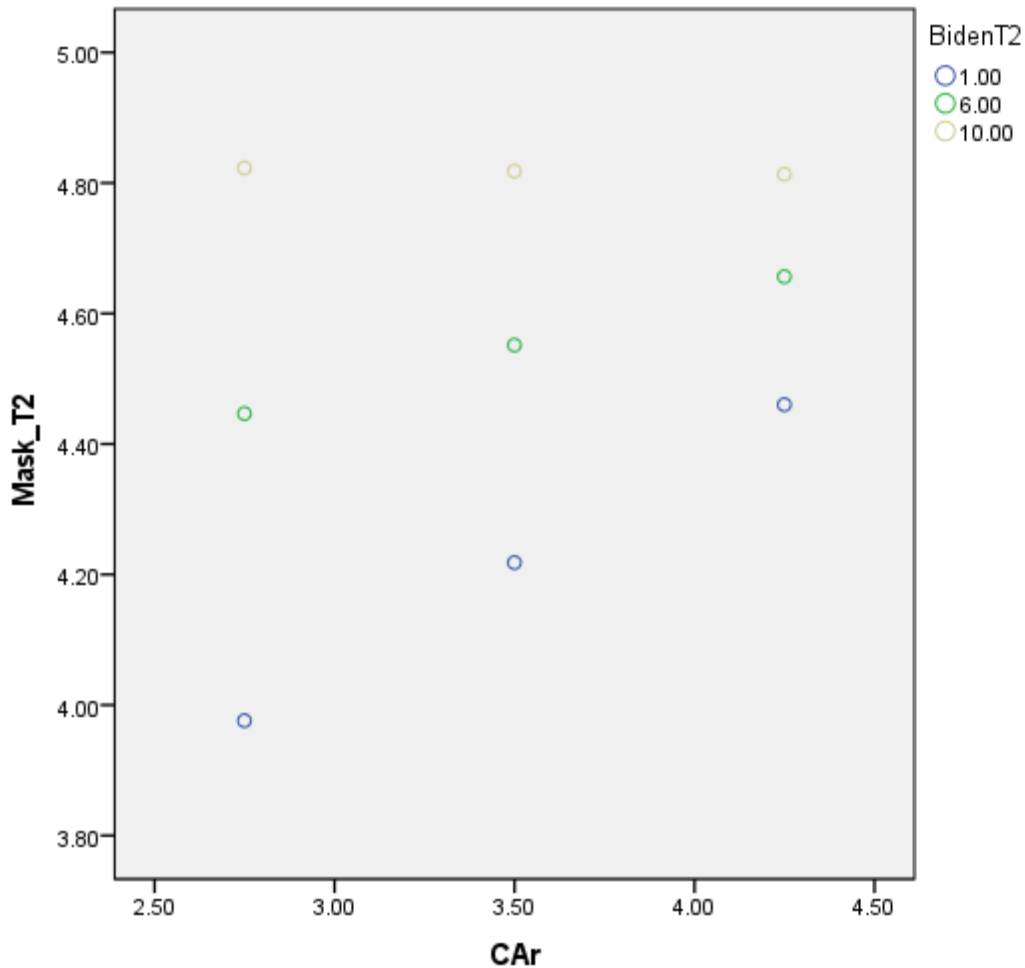

\*SELECTING ONLY over 50

USE ALL.

COMPUTE filter\_\$=((OVER50 = 1) AND (xconfirm = 1)).

VARIABLE LABELS filter\_\$ '(OVER50 = 1) AND (xconfirm = 1) (FILTER)'.  
VALUE LABELS filter\_\$ 0 'Not Selected' 1 'Selected'.

FORMATS filter\_\$ (f1.0).

FILTER BY filter\_\$.

EXECUTE.

\*Weights for over 50 age group

DATASET ACTIVATE DataSet1.  
WEIGHT BY xadj\_over50\_weight.  
\* Encoding: UTF-8.

/\* PROCESS version 3.5 \*/.  
/\* Written by Andrew F. Hayes \*/.  
/\* www.afhayes.com \*/.  
/\* www.processmacro.org \*/.  
/\* Copyright 2017-2020 by Andrew F. Hayes \*/.  
/\* Documented in <http://www.guilford.com/p/hayes3> \*/.  
/\* PROCESS workshop schedule at <http://www.processmacro.org/workshops.html>  
\*/.

/\* THIS SOFTWARE IS PROVIDED "AS IS", WITHOUT WARRANTY OF ANY KIND \*/.  
/\* EXPRESS OR IMPLIED, INCLUDING BUT NOT LIMITED TO THE WARRANTIES OF \*/.  
/\* MERCHANTABILITY, FITNESS FOR A PARTICULAR PURPOSE AND NONINFRINGEMENT \*/.  
/\* IN NO EVENT SHALL THE COPYRIGHT HOLDERS BE LIABLE FOR ANY CLAIM, \*/.  
/\* DAMAGES OR OTHER LIABILITY, WHETHER IN AN ACTION OF CONTRACT, TORT \*/.  
/\* OR OTHERWISE, ARISING FROM, OUT OF OR IN CONNECTION WITH THE \*/.  
/\* SOFTWARE OR THE USE OR OTHER DEALINGS IN THE SOFTWARE \*/.  
/\* USE OF THIS SOFTWARE IMPLIES AGREEMENT WITH THESE TERMS \*/.

set printback=off.

Run MATRIX procedure:

\*\*\*\*\* PROCESS Procedure for SPSS Version 3.5 \*\*\*\*\*

Written by Andrew F. Hayes, Ph.D.      [www.afhayes.com](http://www.afhayes.com)  
Documentation available in Hayes (2018). [www.guilford.com/p/hayes3](http://www.guilford.com/p/hayes3)

\*\*\*\*\*

Model : 1  
Y : Mask\_T2  
X : CAr  
W : TrumpT2

Covariates:  
ideology black hisp male educ age income

Sample  
Size: 1243

\*\*\*\*\*

OUTCOME VARIABLE:  
Mask\_T2

Model Summary

|  | R     | R-sq  | MSE   | F       | df1     | df2       | p     |
|--|-------|-------|-------|---------|---------|-----------|-------|
|  | .3011 | .0907 | .3854 | 12.2825 | 10.0000 | 1232.0000 | .0000 |

Model

|  | coeff | se | t | p | LLCI | ULCI |
|--|-------|----|---|---|------|------|
|--|-------|----|---|---|------|------|

|          |        |       |         |       |        |        |
|----------|--------|-------|---------|-------|--------|--------|
| constant | 4.2736 | .2587 | 16.5178 | .0000 | 3.7660 | 4.7812 |
| CAR      | .0131  | .0278 | .4706   | .6380 | -.0415 | .0677  |
| TrumpT2  | -.0777 | .0208 | -3.7440 | .0002 | -.1184 | -.0370 |
| Int_1    | .0098  | .0055 | 1.7895  | .0738 | -.0009 | .0205  |
| ideology | -.0192 | .0133 | -1.4487 | .1477 | -.0452 | .0068  |
| black    | -.0403 | .0463 | -.8701  | .3844 | -.1311 | .0505  |
| hisp     | .0813  | .0439 | 1.8518  | .0643 | -.0048 | .1675  |
| male     | -.0809 | .0386 | -2.0973 | .0362 | -.1565 | -.0052 |
| educ     | .0224  | .0100 | 2.2405  | .0252 | .0028  | .0420  |
| age      | .0044  | .0025 | 1.7514  | .0801 | -.0005 | .0093  |
| income   | .0004  | .0004 | 1.0180  | .3089 | -.0004 | .0012  |

Product terms key:

Int\_1 : CAR x TrumpT2

Test(s) of highest order unconditional interaction(s):

|     |         |        |        |           |       |
|-----|---------|--------|--------|-----------|-------|
|     | R2-chng | F      | df1    | df2       | p     |
| X*W | .0024   | 3.2024 | 1.0000 | 1232.0000 | .0738 |

-----

Focal predict: CAR (X)  
Mod var: TrumpT2 (W)

Conditional effects of the focal predictor at values of the moderator(s):

|         |        |       |        |       |        |       |
|---------|--------|-------|--------|-------|--------|-------|
| TrumpT2 | Effect | se    | t      | p     | LLCI   | ULCI  |
| .0000   | .0131  | .0278 | .4706  | .6380 | -.0415 | .0677 |
| .0000   | .0131  | .0278 | .4706  | .6380 | -.0415 | .0677 |
| 8.0000  | .0914  | .0365 | 2.5040 | .0124 | .0198  | .1629 |

Data for visualizing the conditional effect of the focal predictor:  
Paste text below into a SPSS syntax window and execute to produce plot.

DATA LIST FREE/

```

CAR      TrumpT2      Mask_T2      .
BEGIN DATA.
  2.7500      .0000      4.8695
  3.7500      .0000      4.8826
  4.5000      .0000      4.8924
  2.7500      .0000      4.8695
  3.7500      .0000      4.8826
  4.5000      .0000      4.8924
  2.7500      8.0000      4.4632
  3.7500      8.0000      4.5545
  4.5000      8.0000      4.6231

```

END DATA.

GRAPH/SCATTERPLOT=

CAR WITH Mask\_T2 BY TrumpT2 .

\*\*\*\*\* ANALYSIS NOTES AND ERRORS \*\*\*\*\*

Level of confidence for all confidence intervals in output:  
95.0000

W values in conditional tables are the 16th, 50th, and 84th percentiles.

----- END MATRIX -----

```

* Encoding: UTF-8.

/* PROCESS version 3.5 */.
/* Written by Andrew F. Hayes */.
/* www.afhayes.com */.
/* www.processmacro.org */.
/* Copyright 2017-2020 by Andrew F. Hayes */.
/* Documented in http://www.guilford.com/p/hayes3 */.
/* PROCESS workshop schedule at http://www.processmacro.org/workshops.html
*/.

/* THIS SOFTWARE IS PROVIDED "AS IS", WITHOUT WARRANTY OF ANY KIND */.
/* EXPRESS OR IMPLIED, INCLUDING BUT NOT LIMITED TO THE WARRANTIES OF */.
/* MERCHANTABILITY, FITNESS FOR A PARTICULAR PURPOSE AND NONINFRINGEMENT */.
/* IN NO EVENT SHALL THE COPYRIGHT HOLDERS BE LIABLE FOR ANY CLAIM, */.
/* DAMAGES OR OTHER LIABILITY, WHETHER IN AN ACTION OF CONTRACT, TORT */.
/* OR OTHERWISE, ARISING FROM, OUT OF OR IN CONNECTION WITH THE */.
/* SOFTWARE OR THE USE OR OTHER DEALINGS IN THE SOFTWARE */.
/* USE OF THIS SOFTWARE IMPLIES AGREEMENT WITH THESE TERMS */.

set printback=off.

```

Run MATRIX procedure:

\*\*\*\*\* PROCESS Procedure for SPSS Version 3.5 \*\*\*\*\*

Written by Andrew F. Hayes, Ph.D.            www.afhayes.com  
Documentation available in Hayes (2018). www.guilford.com/p/hayes3

\*\*\*\*\*

```

Model   : 1
  Y     : Mask_T2
  X     : CAr
  W     : BidenT2

```

```

Covariates:
  ideology black   hisp   male   educ   age   income

```

```

Sample
Size: 1241

```

\*\*\*\*\*

```

OUTCOME VARIABLE:
  Mask_T2

```

```

Model Summary

```

|  | R     | R-sq  | MSE   | F       | df1     | df2       | p     |
|--|-------|-------|-------|---------|---------|-----------|-------|
|  | .3056 | .0934 | .3894 | 12.6737 | 10.0000 | 1230.0000 | .0000 |

  

```

Model

```

|          | coeff  | se    | t       | p     | LLCI   | ULCI   |
|----------|--------|-------|---------|-------|--------|--------|
| constant | 3.4642 | .2799 | 12.3764 | .0000 | 2.9151 | 4.0133 |

|          |        |       |         |       |        |        |
|----------|--------|-------|---------|-------|--------|--------|
| CAR      | .1237  | .0406 | 3.0446  | .0024 | .0440  | .2034  |
| BidentT2 | .0916  | .0208 | 4.3955  | .0000 | .0507  | .1325  |
| Int_1    | -.0131 | .0055 | -2.3916 | .0169 | -.0238 | -.0023 |
| ideology | -.0127 | .0138 | -.9200  | .3578 | -.0397 | .0144  |
| black    | -.0486 | .0468 | -1.0395 | .2988 | -.1404 | .0432  |
| hisp     | .0678  | .0443 | 1.5287  | .1266 | -.0192 | .1547  |
| male     | -.0677 | .0389 | -1.7416 | .0818 | -.1440 | .0086  |
| educ     | .0271  | .0100 | 2.7047  | .0069 | .0075  | .0468  |
| age      | .0032  | .0025 | 1.2650  | .2061 | -.0018 | .0081  |
| income   | .0003  | .0004 | .8307   | .4063 | -.0005 | .0012  |

Product terms key:

Int\_1 : CAR x BidentT2

Test(s) of highest order unconditional interaction(s):

|     |         |        |        |           |       |
|-----|---------|--------|--------|-----------|-------|
|     | R2-chng | F      | df1    | df2       | p     |
| X*W | .0042   | 5.7196 | 1.0000 | 1230.0000 | .0169 |

-----

Focal predict: CAR (X)  
Mod var: BidentT2 (W)

Conditional effects of the focal predictor at values of the moderator(s):

|          |        |       |        |       |        |       |
|----------|--------|-------|--------|-------|--------|-------|
| BidentT2 | Effect | se    | t      | p     | LLCI   | ULCI  |
| .0000    | .1237  | .0406 | 3.0446 | .0024 | .0440  | .2034 |
| 8.0000   | .0192  | .0254 | .7547  | .4506 | -.0307 | .0691 |
| 10.0000  | -.0069 | .0315 | -.2197 | .8261 | -.0687 | .0549 |

Data for visualizing the conditional effect of the focal predictor:

Paste text below into a SPSS syntax window and execute to produce plot.

DATA LIST FREE/

CAR BidentT2 Mask\_T2 .

BEGIN DATA.

```

2.7500 .0000 4.3785
3.7500 .0000 4.5022
4.5000 .0000 4.5950
2.7500 8.0000 4.8240
3.7500 8.0000 4.8432
4.5000 8.0000 4.8576
2.7500 10.0000 4.9354
3.7500 10.0000 4.9285
4.5000 10.0000 4.9233

```

END DATA.

GRAPH/SCATTERPLOT=

CAR WITH Mask\_T2 BY BidentT2 .

\*\*\*\*\* ANALYSIS NOTES AND ERRORS \*\*\*\*\*

Level of confidence for all confidence intervals in output:

95.0000

W values in conditional tables are the 16th, 50th, and 84th percentiles.

----- END MATRIX -----

```

* Encoding: UTF-8.

/* PROCESS version 3.5 */.
/* Written by Andrew F. Hayes */.
/* www.afhayes.com */.
/* www.processmacro.org */.
/* Copyright 2017-2020 by Andrew F. Hayes */.
/* Documented in http://www.guilford.com/p/hayes3 */.
/* PROCESS workshop schedule at http://www.processmacro.org/workshops.html
*/.

/* THIS SOFTWARE IS PROVIDED "AS IS", WITHOUT WARRANTY OF ANY KIND */.
/* EXPRESS OR IMPLIED, INCLUDING BUT NOT LIMITED TO THE WARRANTIES OF */.
/* MERCHANTABILITY, FITNESS FOR A PARTICULAR PURPOSE AND NONINFRINGEMENT */.
/* IN NO EVENT SHALL THE COPYRIGHT HOLDERS BE LIABLE FOR ANY CLAIM, */.
/* DAMAGES OR OTHER LIABILITY, WHETHER IN AN ACTION OF CONTRACT, TORT */.
/* OR OTHERWISE, ARISING FROM, OUT OF OR IN CONNECTION WITH THE */.
/* SOFTWARE OR THE USE OR OTHER DEALINGS IN THE SOFTWARE */.
/* USE OF THIS SOFTWARE IMPLIES AGREEMENT WITH THESE TERMS */.

```

```
set printback=off.
```

```
Run MATRIX procedure:
```

```
***** PROCESS Procedure for SPSS Version 3.5 *****
```

```

                Written by Andrew F. Hayes, Ph.D.      www.afhayes.com
Documentation available in Hayes (2018). www.guilford.com/p/hayes3

```

```
*****
```

```

Model   : 1
  Y     : Mask_T2
  X     : Reactr
  W     : BidenT2

```

```
Covariates:
```

```
ideology black    hisp      male      educ      age      income
```

```
Sample
```

```
Size: 1238
```

```
*****
```

```
OUTCOME VARIABLE:
```

```
Mask_T2
```

```
Model Summary
```

|  | R     | R-sq  | MSE   | F       | df1     | df2       | p     |
|--|-------|-------|-------|---------|---------|-----------|-------|
|  | .2965 | .0879 | .3926 | 11.8227 | 10.0000 | 1227.0000 | .0000 |

```
Model
```

|          | coeff  | se    | t       | p     | LLCI   | ULCI   |
|----------|--------|-------|---------|-------|--------|--------|
| constant | 4.1992 | .2876 | 14.5996 | .0000 | 3.6349 | 4.7634 |

|          |        |       |         |       |        |        |
|----------|--------|-------|---------|-------|--------|--------|
| Reactr   | -.0687 | .0468 | -1.4656 | .1430 | -.1606 | .0232  |
| BidenT2  | .0212  | .0201 | 1.0526  | .2927 | -.0183 | .0606  |
| Int_1    | .0074  | .0062 | 1.1922  | .2334 | -.0048 | .0197  |
| ideology | -.0118 | .0139 | -.8476  | .3968 | -.0390 | .0155  |
| black    | -.0576 | .0464 | -1.2405 | .2150 | -.1487 | .0335  |
| hisp     | .0592  | .0446 | 1.3286  | .1842 | -.0282 | .1467  |
| male     | -.0912 | .0375 | -2.4305 | .0152 | -.1648 | -.0176 |
| educ     | .0241  | .0101 | 2.3957  | .0167 | .0044  | .0438  |
| age      | .0030  | .0025 | 1.1709  | .2419 | -.0020 | .0079  |
| income   | .0003  | .0004 | .7719   | .4403 | -.0005 | .0011  |

Product terms key:

Int\_1 : Reactr x BidenT2

Test(s) of highest order unconditional interaction(s):

|     | R2-chng | F      | df1    | df2       | p     |
|-----|---------|--------|--------|-----------|-------|
| X*W | .0011   | 1.4213 | 1.0000 | 1227.0000 | .2334 |

-----

Focal predict: Reactr (X)  
Mod var: BidenT2 (W)

Data for visualizing the conditional effect of the focal predictor:  
Paste text below into a SPSS syntax window and execute to produce plot.

DATA LIST FREE/

| Reactr | BidenT2 | Mask_T2 | . |
|--------|---------|---------|---|
| 2.2500 | .0000   | 4.5435  |   |
| 3.0000 | .0000   | 4.4920  |   |
| 3.7500 | .0000   | 4.4405  |   |
| 2.2500 | 8.0000  | 4.8468  |   |
| 3.0000 | 8.0000  | 4.8399  |   |
| 3.7500 | 8.0000  | 4.8331  |   |
| 2.2500 | 10.0000 | 4.9226  |   |
| 3.0000 | 10.0000 | 4.9269  |   |
| 3.7500 | 10.0000 | 4.9312  |   |

END DATA.

GRAPH/SCATTERPLOT=

Reactr WITH Mask\_T2 BY BidenT2 .

\*\*\*\*\* ANALYSIS NOTES AND ERRORS \*\*\*\*\*

Level of confidence for all confidence intervals in output:  
95.0000

----- END MATRIX -----

\* Encoding: UTF-8.

/\* PROCESS version 3.5 \*/.  
/\* Written by Andrew F. Hayes \*/.  
/\* www.afhayes.com \*/.  
/\* www.processmacro.org \*/.  
/\* Copyright 2017-2020 by Andrew F. Hayes \*/.



```
/* Documented in http://www.guilford.com/p/hayes3 */.
/* PROCESS workshop schedule at http://www.processmacro.org/workshops.html
*/.
```

```
/* THIS SOFTWARE IS PROVIDED "AS IS", WITHOUT WARRANTY OF ANY KIND */.
/* EXPRESS OR IMPLIED, INCLUDING BUT NOT LIMITED TO THE WARRANTIES OF */.
/* MERCHANTABILITY, FITNESS FOR A PARTICULAR PURPOSE AND NONINFRINGEMENT */.
/* IN NO EVENT SHALL THE COPYRIGHT HOLDERS BE LIABLE FOR ANY CLAIM, */.
/* DAMAGES OR OTHER LIABILITY, WHETHER IN AN ACTION OF CONTRACT, TORT */.
/* OR OTHERWISE, ARISING FROM, OUT OF OR IN CONNECTION WITH THE */.
/* SOFTWARE OR THE USE OR OTHER DEALINGS IN THE SOFTWARE */.
/* USE OF THIS SOFTWARE IMPLIES AGREEMENT WITH THESE TERMS */.
```

```
set printback=off.
```

```
Run MATRIX procedure:
```

```
***** PROCESS Procedure for SPSS Version 3.5 *****
```

```
Written by Andrew F. Hayes, Ph.D. www.afhayes.com
Documentation available in Hayes (2018). www.guilford.com/p/hayes3
```

```
*****
```

```
Model : 1
Y : Mask_T2
X : Reactr
W : TrumpT2
```

```
Covariates:
```

```
ideology black hisp male educ age income
```

```
Sample
```

```
Size: 1240
```

```
*****
```

```
OUTCOME VARIABLE:
```

```
Mask_T2
```

```
Model Summary
```

|  | R     | R-sq  | MSE   | F       | df1     | df2       | p     |
|--|-------|-------|-------|---------|---------|-----------|-------|
|  | .3047 | .0929 | .3853 | 12.5812 | 10.0000 | 1229.0000 | .0000 |

```
Model
```

|          | coeff  | se    | t       | p     | LLCI   | ULCI   |
|----------|--------|-------|---------|-------|--------|--------|
| constant | 4.3099 | .2441 | 17.6592 | .0000 | 3.8311 | 4.7887 |
| Reactr   | .0362  | .0321 | 1.1266  | .2601 | -.0268 | .0992  |
| TrumpT2  | .0179  | .0208 | .8598   | .3901 | -.0230 | .0588  |
| Int_1    | -.0194 | .0065 | -3.0077 | .0027 | -.0321 | -.0068 |
| ideology | -.0187 | .0133 | -1.4092 | .1590 | -.0447 | .0073  |
| black    | -.0537 | .0457 | -1.1755 | .2400 | -.1434 | .0359  |
| hisp     | .0690  | .0440 | 1.5697  | .1167 | -.0172 | .1553  |
| male     | -.1020 | .0370 | -2.7573 | .0059 | -.1746 | -.0294 |
| educ     | .0201  | .0100 | 2.0169  | .0439 | .0005  | .0397  |
| age      | .0037  | .0025 | 1.4922  | .1359 | -.0012 | .0086  |
| income   | .0004  | .0004 | .9056   | .3653 | -.0004 | .0012  |

Product terms key:

Int\_1 : Reactr x TrumpT2

Test(s) of highest order unconditional interaction(s):

|     | R2-chng | F      | df1    | df2       | p     |
|-----|---------|--------|--------|-----------|-------|
| X*W | .0067   | 9.0464 | 1.0000 | 1229.0000 | .0027 |

-----

Focal predict: Reactr (X)  
Mod var: TrumpT2 (W)

Conditional effects of the focal predictor at values of the moderator(s):

| TrumpT2 | Effect | se    | t       | p     | LLCI   | ULCI   |
|---------|--------|-------|---------|-------|--------|--------|
| .0000   | .0362  | .0321 | 1.1266  | .2601 | -.0268 | .0992  |
| .0000   | .0362  | .0321 | 1.1266  | .2601 | -.0268 | .0992  |
| 8.0000  | -.1192 | .0418 | -2.8548 | .0044 | -.2012 | -.0373 |

Data for visualizing the conditional effect of the focal predictor:  
Paste text below into a SPSS syntax window and execute to produce plot.

DATA LIST FREE/

```
Reactr TrumpT2 Mask_T2 .
BEGIN DATA.
  2.2500 .0000 4.8552
  3.0000 .0000 4.8823
  3.7500 .0000 4.9094
  2.2500 .0000 4.8552
  3.0000 .0000 4.8823
  3.7500 .0000 4.9094
  2.2500 8.0000 4.6489
  3.0000 8.0000 4.5595
  3.7500 8.0000 4.4701
```

END DATA.

GRAPH/SCATTERPLOT=

```
Reactr WITH Mask_T2 BY TrumpT2 .
```

\*\*\*\*\* ANALYSIS NOTES AND ERRORS \*\*\*\*\*

Level of confidence for all confidence intervals in output:  
95.0000

W values in conditional tables are the 16th, 50th, and 84th percentiles.

----- END MATRIX -----

DATASET ACTIVATE DataSet1.

DATA LIST FREE/

```
Reactr TrumpT2 Mask_T2 .
BEGIN DATA.
  2.2500 .0000 4.8552
  3.0000 .0000 4.8823
  3.7500 .0000 4.9094
  2.2500 .0000 4.8552
```

|        |        |        |
|--------|--------|--------|
| 3.0000 | .0000  | 4.8823 |
| 3.7500 | .0000  | 4.9094 |
| 2.2500 | 8.0000 | 4.6489 |
| 3.0000 | 8.0000 | 4.5595 |
| 3.7500 | 8.0000 | 4.4701 |

END DATA.

GRAPH/SCATTERPLOT=

Reactr WITH Mask\_T2 BY TrumpT2 .

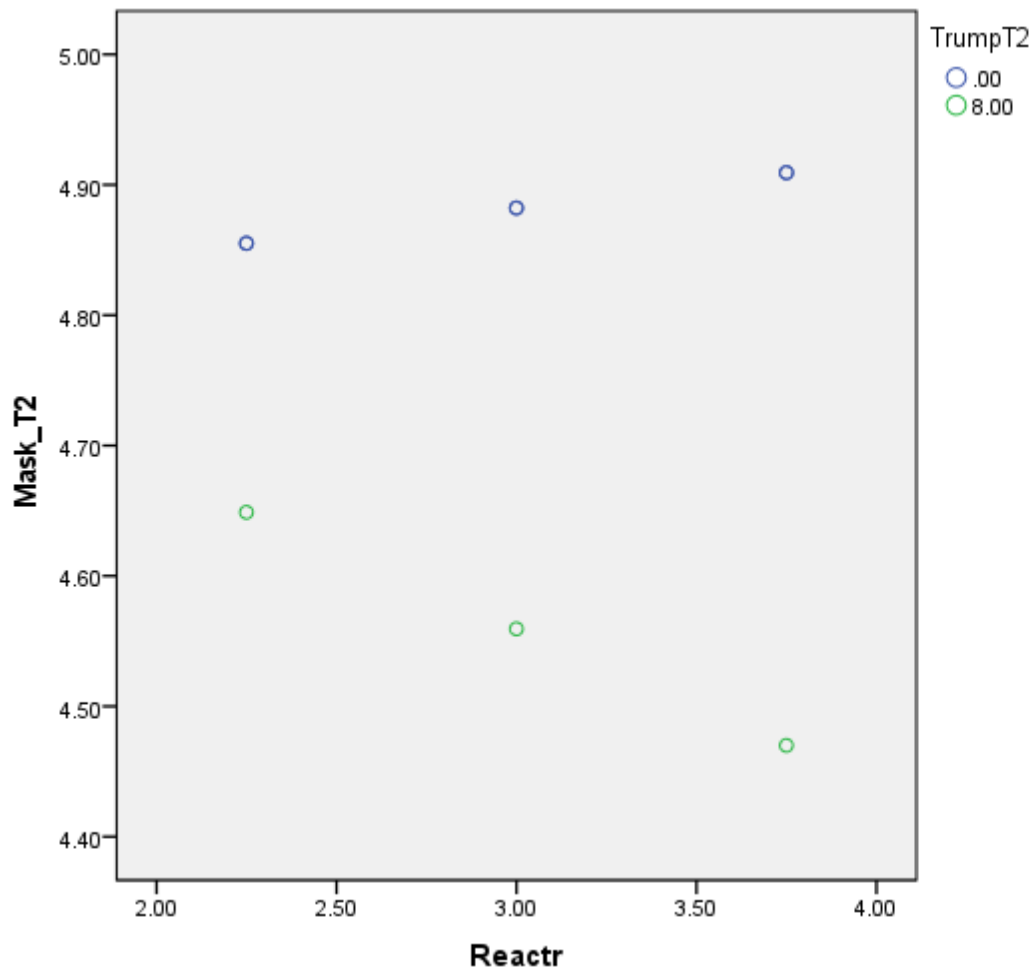

Supplement: mmc1.pdf [file mmc1.pdf]
